# Supplementary material for: The impact of pharmaceutical innovation on premature cancer mortality in Canada, 2000–2011
Source: Int J Health Econ Manag. 2015 Jun 26;15(3):339–59. doi: 10.1007/s10754-015-9172-2 (PMC6116915; doi:10.1007/s10754-015-9172-2)
Supplement: Supplementary file 1 — Supplementary material 1 (xlsx 178 KB) [file 10754_2015_9172_MOESM1_ESM.xlsx]

## Sheet: Appendix Table 1
Appendix Table 1
Drugs (sorted by launch year) used to treat various types of cancer in Canada
Drug	Canada launch year	C00-C14 lip, oral cavity and pharynx	C15-C26 digestive organs	C30-C39 respiratory system and intrathoracic organs	C40-C41 bone and articular cartilage	C43-C44 skin	C45-C49 connective and soft tissue	C50-C50 breast	C51-C58 female genital organs	C60-C63 male genital organs	C64-C68 urinary organs	C69-C72 eye, brain and central nervous system	C73-C75 endocrine glands and related structures	C76-C80 secondary and ill-defined	C81-C96 stated or presumed to be primary, of lymphoid, haematopoietic and related tissue	C97 independent (primary) multiple sites
J06BA01 Immunoglobulins, normal human, for extravascular adm.	1951														x
L01AA05 Chlormethine	1951														x
H02AB09 Hydrocortisone	1954											x		x
L01AB01 Busulfan	1954														x
L01BB02 Mercaptopurine	1954														x
G03CA03 Estradiol	1955									x
L01BA01 Methotrexate	1955			x	x		x	x	x		x	x		x	x
L02AA01 Diethylstilbestrol	1956									x
L01AA02 Chlorambucil	1957														x
H02AB02 Dexamethasone	1958	x	x	x	x	x	x								x
H02AB08 Triamcinolone	1958			x										x
L01AA01 Cyclophosphamide	1959			x			x	x	x	x	x	x	x	x	x
L01AC01 Thiotepa	1959							x	x		x
H02AB04 Methylprednisolone	1960	x	x	x	x	x	x	x	x	x	x	x	x	x	x	x
H02AB01 Betamethasone	1961	x	x	x	x	x	x					x		x	x
L01DA01 Dactinomycin	1963						x		x	x	x
L01AA03 Melphalan	1964						x	x	x			x	x		x
D07AC01 Betamethasone	1965														x
H02AB06 Prednisolone	1967											x		x
C03CC01 Etacrynic acid	1968													x
L01XB01 Procarbazine	1970			x								x		x	x
L01DB02 Daunorubicin	1971						x								x
L01DC01 Bleomycin	1973			x			x		x	x				x	x
L01BB03 Tioguanine	1974														x
L01XX02 Asparaginase	1974														x
L01AD01 Carmustine	1975					x						x			x
L01BC02 Fluorouracil	1975	x	x	x				x	x					x
L01AD02 Lomustine	1976			x		x						x		x	x
L01AX04 Dacarbazine	1976					x	x								x
L01DB01 Doxorubicin	1976		x	x	x		x	x	x		x				x
L01BC01 Cytarabine	1977														x
L01DC03 Mitomycin	1977		x					x			x			x
B01AB04 Dalteparin	1979	x	x	x	x	x	x	x	x	x	x	x	x	x	x	x
L01XX05 Hydroxycarbamide	1979														x
L01XX23 Mitotane	1979												x
V03AF03 Calcium folinate	1980	x	x	x	x	x	x	x	x	x	x	x	x	x	x	x
L01CB01 Etoposide	1981			x				x	x	x				x	x
L01CA03 Vindesine	1982	x	x	x				x						x	x
H05BA01 Calcitonin (salmon synthetic)	1983													x	x
L01XX01 Amsacrine	1983														x
L02BG01 Aminogluthetimide	1983												x
L01CA02 Vincristine	1984			x	x		x	x	x		x	x	x	x	x
L01CB02 Teniposide	1984								x		x				x
L01DB07 Mitoxantrone	1984							x		x					x
L02BB01 Flutamide	1984									x
D05BA02 Methoxsalen	1985														x
L01AD04 Streptozocin	1985		x
L01DB03 Epirubicin	1985		x	x			x	x	x		x			x	x
L01XA01 Cisplatin	1985		x	x					x	x	x
L02AE02 Leuprorelin	1985							x		x
D05AD02 Methoxsalen, topical	1986														x
J06BA02 Immunoglobulins, normal human, for intravascular adm.	1986														x
L01XA02 Carboplatin	1986	x		x					x					x
L03AB05 Interferon alfa-2b	1986					x									x
G03HA01 Cyproterone	1987									x
L02AE01 Buserelin	1988									x
H01CB02 Octreotide	1989		x											x
L01AA06 Ifosfamide	1989			x	x		x	x	x	x				x	x
L03AB04 Interferon alfa-2a	1989					x	x				x				x
B03XA01 Erythropoietin	1990	x	x	x	x	x	x	x	x	x	x	x	x	x	x	x
J02AC01 Fluconazole	1990	x	x	x	x	x	x	x	x	x	x	x	x	x	x	x
L03AX03 BCG vaccine	1990										x
L01DB06 Idarubicin	1991														x
L01BB05 Fludarabine	1992														x
L01CA01 Vinblastine	1992						x	x	x	x	x				x
L01CD01 Paclitaxel	1992			x			x	x	x					x
L02BB02 Nilutamide	1992									x
M05BA03 Pamidronic acid	1992							x						x	x
L01BB04 Cladribine	1993														x
L01XX08 Pentostatin	1993														x
L01XX11 Estramustine	1993									x
L01CA04 Vinorelbine	1994			x				x						x
L02AE03 Goserelin	1994							x		x
L02BG02 Formestane	1994							x
L01CD02 Docetaxel	1995	x	x	x				x		x				x
L01XD01 Porfimer sodium	1995		x	x										x
L01XX03 Altretamine	1995			x					x					x
L01XX14 Tretinoin	1995														x
L04AX03 Methotrexate	1995														x
V03AF02 Dexrazoxane	1995							x
L01BA03 Raltitrexed	1996		x											x
L01BC05 Gemcitabine	1996		x	x				x	x		x			x
L02BB03 Bicalutamide	1996									x
L02BG03 Anastrozole	1996							x
V03AF05 Amifostine	1996								x
L01XX17 Topotecan	1997			x					x					x
L01XX19 Irinotecan	1997		x											x
L01XX24 Pegaspargase	1997														x
L02BG04 Letrozole	1997							x
M05BA06 Ibandronic acid	1997							x						x
L01BC06 Capecitabine	1998		x					x						x
D06BB10 Imiquimod	1999					x
L01AX03 Temozolomide	1999											x
L01XC03 Trastuzumab	1999		x					x						x
L02AE04 Triptorelin	1999									x
L01XC02 Rituximab	2000														x
L02BG06 Exemestane	2000							x
M05BA08 Zoledronic acid	2000	x	x	x	x	x	x	x	x	x	x	x	x	x	x	x
L01XE01 Imatinib	2001					x									x
B03XA02 Darbepoetin alfa	2002	x	x	x	x	x	x	x	x	x	x	x	x	x	x	x
L01XE02 Gefitinib	2003			x										x
L02BA03 Fulvestrant	2003							x
H05BX01 Cinacalcet	2004												x
L01BA04 Pemetrexed	2004			x			x							x
L01XX32 Bortezomib	2004														x
L01XC06 Cetuximab	2005		x				x							x
L01XC07 Bevacizumab	2005		x	x				x			x			x
L01XE03 Erlotinib	2005		x	x										x
J07BM01 Papillomavirus (human types 6, 11, 16, 18)	2006								x
L01XE04 Sunitinib	2006		x
L01XE05 Sorafenib	2006		x
L01BB07 Nelarabine	2007														x
L01XA03 Oxaliplatin	2007		x											x
L01XE06 Dasatinib	2007														x
L01XE09 Temsirolimus	2007														x
L01XC08 Panitumumab	2008		x											x
L01XE08 Nilotinib	2008														x
L04AX04 Lenalidomide	2008														x
L01BB06 Clofarabine	2009														x
L01BC07 Azacitidine	2009														x
L01XD03 Methyl aminolevulinate	2009					x
L01XE07 Lapatinib	2009							x
L02BX02 Degarelix	2009									x
J07BM02 Papillomavirus (human types 16, 18)	2010								x
L01CX01 Trabectedin	2010						x		x
L01XE11 Pazopanib	2010										x
L04AX02 Thalidomide	2010														x
L01XX41 Eribulin	2011							x
L02BX03 Abiraterone	2011									x
L03AX16 Plerixafor	2011														x
L01AA09 Bendamustine	2012							x							x
L01XC10 Ofatumumab	2012														x
L01XC11 Ipilimumab	2012					x
L01XX27 Arsenic trioxide	2013														x

## Sheet: est1
Parameter	Level1	Empirical Standard	Lag	95% Lower Confidence	Estimate	95% Upper Confidence	Z	Pr > |Z|	dependent	weight
cum_0		0.0085	0	-0.0195	-0.0028	0.0138	-0.33	0.7385	llyl75	lyl75_mean
cum_5		0.0076	5	-0.0205	-0.0056	0.0094	-0.73	0.4659	llyl75	lyl75_mean
cum_10		0.0027	10	-0.018	-0.0127	-0.0074	-4.69	<.0001	llyl75	lyl75_mean
cum_15		0.0024	15	-0.0257	-0.0211	-0.0165	-8.96	<.0001	llyl75	lyl75_mean
cum_20		0.0025	20	-0.0237	-0.0188	-0.014	-7.58	<.0001	llyl75	lyl75_mean
cum_25		0.0028	25	-0.0285	-0.023	-0.0174	-8.09	<.0001	llyl75	lyl75_mean
cum_0		0.0094	0	-0.0241	-0.0057	0.0127	-0.61	0.5427	llyl65	lyl65_mean
cum_5		0.0073	5	-0.0206	-0.0064	0.0078	-0.88	0.3784	llyl65	lyl65_mean
cum_10		0.0025	10	-0.0172	-0.0122	-0.0072	-4.8	<.0001	llyl65	lyl65_mean
cum_15		0.0033	15	-0.029	-0.0225	-0.016	-6.78	<.0001	llyl65	lyl65_mean
cum_20		0.0026	20	-0.0273	-0.0223	-0.0173	-8.72	<.0001	llyl65	lyl65_mean
cum_25		0.0025	25	-0.0311	-0.0263	-0.0215	-10.74	<.0001	llyl65	lyl65_mean
cum_0		0.0091	0	-0.0308	-0.013	0.0048	-1.43	0.1519	llyl55	lyl55_mean
cum_5		0.0088	5	-0.0316	-0.0143	0.003	-1.62	0.1045	llyl55	lyl55_mean
cum_10		0.0051	10	-0.026	-0.0161	-0.0062	-3.19	0.0014	llyl55	lyl55_mean
cum_15		0.004	15	-0.0319	-0.0241	-0.0164	-6.1	<.0001	llyl55	lyl55_mean
cum_20		0.0037	20	-0.0325	-0.0253	-0.0182	-6.92	<.0001	llyl55	lyl55_mean
cum_25		0.0052	25	-0.039	-0.0288	-0.0186	-5.53	<.0001	llyl55	lyl55_mean

## Sheet: resid1
group	lyl55_mean	lyl65_mean	lyl75_mean	Raw Residual	deaths_mean	Year	deaths	age	lyl55	lyl65	lyl75	pop_lt75	pop_lt65	pop_lt55	pop_total	ldeaths	llyl55	llyl65	llyl75	n_drug	cum	cum_0	cum_5	cum_10	cum_15	cum_20	cum_25	n_class	cumclass	cumclass_0	cumclass_5	cumclass_10	cumclass_15	cumclass_20	cumclass_25	cases	age_diag	cases_lt75_avg	cases_lt65_avg	cases_lt55_avg	lcases	lcases_lt75_avg	lcases_lt65_avg	lcases_lt55_avg	resid_abs
C00-C14	5.1475	14.516	31.424	-0.10668	1066	2000	901	68.1604	5.8464	14.613	29.485	28989695	26842052	24031980	30685730	6.80351	1.76582	2.68193	3.38387	1	12	12	11	10	7	6	4	1	10	10	9	8	5	4	2	3185	63.4341	8.1514	5.6958	3.5237	8.0662	2.09819	1.73973	1.2595	0.10668
C00-C14	5.1475	14.516	31.424	0.0128	1066	2001	1029	68.4524	5.6945	15.447	32.593	29270445	27108306	24189914	31020596	6.93634	1.7395	2.73743	3.48409	.	12	12	11	10	8	6	4	.	10	10	9	8	6	4	2	3160	63.3623	8.1226	5.764	3.5567	8.0583	2.09465	1.75164	1.26884	0.0128
C00-C14	5.1475	14.516	31.424	0.06234	1066	2002	1088	68.1255	5.9162	15.859	34.36	29553108	27378337	24289082	31358418	6.9921	1.7777	2.76375	3.5369	1	13	13	11	10	8	7	4	.	10	10	9	8	6	5	2	3140	63.3678	8.1942	5.8727	3.6351	8.052	2.10343	1.77032	1.29062	0.06234
C00-C14	5.1475	14.516	31.424	0.06183	1066	2003	1018	67.5982	5.8135	16.057	33.789	29780450	27589965	24339745	31641630	6.9256	1.76019	2.77612	3.52013	.	13	13	11	10	8	7	4	.	10	10	9	8	6	5	2	3145	62.5874	8.2874	6.0252	3.7267	8.0536	2.11473	1.79595	1.31553	0.06183
C00-C14	5.1475	14.516	31.424	-0.008	1066	2004	1067	68.8894	4.6907	14.131	31.381	30026229	27810425	24409913	31938004	6.97261	1.54559	2.6484	3.4462	.	13	13	11	10	8	7	5	.	10	10	9	8	6	5	3	3260	62.9448	8.3494	6.1602	3.7811	8.0895	2.12219	1.81811	1.33001	0.008
C00-C14	5.1475	14.516	31.424	0.03052	1066	2005	1053	68.7417	5.1964	14.686	31.453	30275449	28036863	24488083	32242364	6.9594	1.64797	2.6869	3.44849	.	13	13	12	11	10	7	6	.	10	10	10	9	8	5	4	3415	62.9905	8.4329	6.2912	3.8199	8.1359	2.13214	1.83915	1.34023	0.03052
C00-C14	5.1475	14.516	31.424	-0.07094	1066	2006	1022	69.4569	4.4975	12.951	28.313	30542403	28260547	24569090	32570505	6.92952	1.50353	2.56117	3.34332	.	13	13	12	11	10	8	6	.	10	10	10	9	8	6	4	3325	63.7857	8.4325	6.3083	3.7717	8.1092	2.13209	1.84187	1.32752	0.07094
C00-C14	5.1475	14.516	31.424	0.0667	1066	2007	1108	68.2423	5.3455	15.54	33.886	30809293	28475290	24646922	32887928	7.01031	1.67625	2.7434	3.523	.	13	13	13	11	10	8	7	.	10	10	10	9	8	6	5	3640	63.8805	8.576	6.4975	3.8098	8.1997	2.14897	1.87141	1.33758	0.0667
C00-C14	5.1475	14.516	31.424	0.01797	1066	2008	1105	69.1665	5.4182	14.631	31.335	31119019	28713168	24749702	33245773	7.0076	1.68977	2.68314	3.44472	.	13	13	13	11	10	8	7	.	10	10	10	9	8	6	5	3630	63.3333	8.7096	6.6427	3.8457	8.197	2.16442	1.89352	1.34696	0.01797
C00-C14	5.1475	14.516	31.424	-0.07087	1066	2009	1065	69.6775	4.5398	12.897	28.612	31459329	28967461	24858115	33628571	6.97073	1.51288	2.55701	3.35381	.	13	13	13	11	10	8	7	.	10	10	10	9	8	6	5	3875	63.3387	8.9769	6.8718	3.9001	8.2623	2.19465	1.92743	1.361	0.07087
C00-C14	5.1475	14.516	31.424	-0.01744	1066	2010	1150	69.6826	4.6209	13.669	30.687	31788672	29209131	24940838	34005274	7.04752	1.5306	2.61511	3.42384	.	13	13	13	12	11	10	7	.	10	10	10	10	9	8	5	3890	63.8239	9.0938	6.9897	3.8694	8.2662	2.20759	1.94444	1.35311	0.01744
C00-C14	5.1475	14.516	31.424	0.02176	1066	2011	1186	69.7095	4.1899	13.709	31.195	32079232	29392470	24988937	34342780	7.07834	1.43267	2.61807	3.44025	.	13	13	13	12	11	10	8	.	10	10	10	10	9	8	6	.	.	.	.	.	.	.	.	.	0.02176
C15-C26	49.3307	153.522	366.986	-0.06109	18085.2	2000	16542	72.5154	50.2123	151.756	360.963	28989695	26842052	24031980	30685730	9.71366	3.91626	5.02228	5.88877	1	23	23	17	15	12	8	4	1	18	18	14	12	9	6	2	29345	69.7687	59.2547	32.5248	15.2866	10.2869	4.08185	3.482	2.72698	0.06109
C15-C26	49.3307	153.522	366.986	-0.06229	18085.2	2001	16608	72.7209	49.378	148.91	353.649	29270445	27108306	24189914	31020596	9.71764	3.89951	5.00334	5.8683	.	23	23	19	15	12	8	5	.	18	18	15	12	9	6	3	29560	69.8368	60.121	33.2516	15.7165	10.2942	4.09636	3.5041	2.75471	0.06229
C15-C26	49.3307	153.522	366.986	-0.07002	18085.2	2002	17040	72.9114	48.4559	147.149	352.076	29553108	27378337	24289082	31358418	9.74332	3.88065	4.99145	5.86385	1	24	24	20	15	12	9	6	.	18	18	16	12	9	7	4	30025	69.6732	61.1425	34.1871	16.2038	10.3098	4.11321	3.53185	2.78524	0.07002
C15-C26	49.3307	153.522	366.986	-0.02249	18085.2	2003	17276	72.737	50.5696	153.52	363.262	29780450	27589965	24339745	31641630	9.75707	3.92335	5.03383	5.89512	.	24	24	21	15	12	9	6	.	18	18	16	12	9	7	4	30440	69.8127	61.5761	34.8035	16.4161	10.3235	4.12027	3.54972	2.79826	0.02249
C15-C26	49.3307	153.522	366.986	-0.01151	18085.2	2004	17759	72.8958	50.4549	154.325	365.767	30026229	27810425	24409913	31938004	9.78465	3.92108	5.03906	5.902	.	24	24	22	15	13	9	7	.	18	18	17	12	10	7	5	31670	69.625	62.5796	35.808	16.8502	10.3631	4.13644	3.57817	2.82436	0.01151
C15-C26	49.3307	153.522	366.986	0.01968	18085.2	2005	18020	73.0061	47.1045	150.748	363.933	30275449	28036863	24488083	32242364	9.79924	3.85237	5.01561	5.89697	3	27	27	23	17	15	12	8	1	19	19	18	14	12	9	6	32580	69.7099	63.2407	36.7015	17.1319	10.3915	4.14695	3.60282	2.84094	0.01968
C15-C26	49.3307	153.522	366.986	0.03665	18085.2	2006	18019	72.909	49.0555	156.066	368.791	30542403	28260547	24569090	32570505	9.79918	3.89295	5.05028	5.91023	2	29	29	23	19	15	12	8	.	19	19	18	15	12	9	6	32785	69.5261	64.0906	37.6922	17.5448	10.3977	4.1603	3.62945	2.86476	0.03665
C15-C26	49.3307	153.522	366.986	0.02504	18085.2	2007	18617	72.9024	50.558	159.273	380.181	30809293	28475290	24646922	32887928	9.83183	3.92312	5.07062	5.94065	1	30	30	24	20	15	12	9	.	19	19	18	16	12	9	7	34155	69.5004	65.2346	38.8251	18.0926	10.4387	4.17799	3.65907	2.8955	0.02504
C15-C26	49.3307	153.522	366.986	0.06062	18085.2	2008	18976	73.0169	51.4006	161.116	382.48	31119019	28713168	24749702	33245773	9.85093	3.93965	5.08212	5.94668	1	31	31	24	21	15	12	9	.	19	19	18	16	12	9	7	34835	69.5633	66.5866	39.9891	18.6068	10.4584	4.1985	3.68861	2.92353	0.06062
C15-C26	49.3307	153.522	366.986	0.02907	18085.2	2009	19018	73.2371	50.386	155.105	369.835	31459329	28967461	24858115	33628571	9.85314	3.91971	5.0441	5.91306	.	31	31	24	22	15	13	9	.	19	19	18	17	12	10	7	35580	69.473	67.5884	40.969	18.9975	10.4795	4.21344	3.71281	2.94431	0.02907
C15-C26	49.3307	153.522	366.986	0.00817	18085.2	2010	19270	73.3597	46.5381	150.893	368.251	31788672	29209131	24940838	34005274	9.8663	3.84027	5.01657	5.90876	.	31	31	27	23	17	15	12	.	19	19	19	18	14	12	9	34730	69.3356	68.0787	41.6352	19.3095	10.4554	4.22067	3.72895	2.9606	0.00817
C15-C26	49.3307	153.522	366.986	0.04818	18085.2	2011	19877	73.4245	47.8552	153.402	374.646	32079232	29392470	24988937	34342780	9.89732	3.86818	5.03306	5.92598	.	31	31	29	23	19	15	12	.	19	19	19	18	15	12	9	.	.	.	.	.	.	.	.	.	0.04818
C30-C39	38.8763	152.732	408.713	-0.01645	18592.5	2000	16772	70.0745	44.5032	162.273	420.322	28989695	26842052	24031980	30685730	9.72747	3.79556	5.08928	6.04102	1	30	30	27	22	18	13	9	1	19	19	18	15	13	10	6	21430	68.5196	51.882	27.7554	11.3212	9.9725	3.94897	3.32343	2.42668	0.01645
C30-C39	38.8763	152.732	408.713	0.0003	18592.5	2001	17208	70.3331	45.4218	161.5	419.263	29270445	27108306	24189914	31020596	9.75313	3.81599	5.08451	6.0385	.	30	30	28	22	19	14	11	.	19	19	18	15	13	11	8	22000	68.7011	51.72	27.8501	11.4192	9.9988	3.94584	3.32684	2.4353	0.0003
C30-C39	38.8763	152.732	408.713	0.00786	18592.5	2002	17799	70.5422	43.0523	162.225	423.829	29553108	27378337	24289082	31358418	9.7869	3.76241	5.08898	6.04933	1	31	31	29	23	19	15	11	.	19	19	18	16	13	12	8	22255	68.8997	51.6096	27.8728	11.4077	10.0103	3.94371	3.32765	2.43428	0.00786
C30-C39	38.8763	152.732	408.713	0.00359	18592.5	2003	17969	70.7606	43.6221	160.176	415.222	29780450	27589965	24339745	31641630	9.7964	3.77556	5.07627	6.02881	1	32	32	29	23	19	15	11	1	20	20	18	16	13	12	8	22485	69.0288	51.1384	27.8167	11.2761	10.0206	3.93453	3.32564	2.42268	0.00359
C30-C39	38.8763	152.732	408.713	0.0019	18592.5	2004	18234	70.862	41.4483	157.441	412.822	30026229	27810425	24409913	31938004	9.81104	3.72445	5.05905	6.02302	1	33	33	29	24	20	16	12	.	20	20	18	16	13	12	9	23095	69.1454	50.9265	27.8566	11.1876	10.0474	3.93038	3.32707	2.41481	0.0019
C30-C39	38.8763	152.732	408.713	0.04275	18592.5	2005	18503	70.9252	40.5442	156.646	414.737	30275449	28036863	24488083	32242364	9.82569	3.70239	5.05399	6.02764	2	35	35	30	27	22	18	13	1	21	21	19	18	15	13	10	23775	69.2981	50.9726	28.0127	11.125	10.0764	3.93129	3.33266	2.40919	0.04275
C30-C39	38.8763	152.732	408.713	0.03346	18592.5	2006	18799	71.2522	39.5009	153.527	409.382	30542403	28260547	24569090	32570505	9.84156	3.67632	5.03387	6.01465	.	35	35	30	28	22	19	14	.	21	21	19	18	15	13	11	23965	69.3621	51.0119	28.1027	11.0447	10.0843	3.93206	3.33587	2.40195	0.03346
C30-C39	38.8763	152.732	408.713	-0.00751	18592.5	2007	19131	71.385	37.4834	151.986	409.815	30809293	28475290	24646922	32887928	9.85907	3.6239	5.02379	6.01571	.	35	35	31	29	23	19	15	.	21	21	19	18	16	13	12	24720	69.5854	51.2519	28.3749	11.0002	10.1154	3.93675	3.3455	2.39791	0.00751
C30-C39	38.8763	152.732	408.713	-0.00368	18592.5	2008	19320	71.6413	33.4226	144.435	399.408	31119019	28713168	24749702	33245773	9.8689	3.50923	4.97283	5.98998	.	35	35	32	29	23	19	15	.	21	21	20	18	16	13	12	24855	69.7068	51.4934	28.493	10.8662	10.1208	3.94145	3.34966	2.38566	0.00368
C30-C39	38.8763	152.732	408.713	0.00146	18592.5	2009	19712	71.7177	33.8119	144.869	400.636	31459329	28967461	24858115	33628571	9.88898	3.52081	4.97583	5.99305	.	35	35	33	29	24	20	16	.	21	21	20	18	16	13	12	25260	69.7308	51.621	28.5221	10.8635	10.137	3.94393	3.35068	2.38541	0.00146
C30-C39	38.8763	152.732	408.713	-0.03241	18592.5	2010	19889	71.8888	32.8517	141.064	393.775	31788672	29209131	24940838	34005274	9.89792	3.492	4.94921	5.97578	.	35	35	35	30	27	22	18	.	21	21	21	19	18	15	13	24665	69.6904	51.4162	28.3584	10.639	10.1131	3.93995	3.34492	2.36453	0.03241
C30-C39	38.8763	152.732	408.713	-0.03127	18592.5	2011	19774	71.987	30.8537	136.642	385.343	32079232	29392470	24988937	34342780	9.89212	3.42926	4.91737	5.95413	.	35	35	35	30	28	22	19	.	21	21	21	19	18	15	13	.	.	.	.	.	.	.	.	.	0.03127
C40-C41	6.9568	8.775	11.262	0.19535	147.25	2000	147	48.9286	9.4249	11.642	14.246	28989695	26842052	24031980	30685730	4.99043	2.24336	2.45463	2.65651	1	12	12	11	11	8	7	4	1	10	10	9	9	6	5	2	325	45.3462	0.917	0.8696	0.8411	5.7838	-0.08668	-0.13967	-0.1731	0.19535
C40-C41	6.9568	8.775	11.262	-0.02164	147.25	2001	150	55.2167	6.635	8.604	11.249	29270445	27108306	24189914	31020596	5.01064	1.89236	2.15227	2.42024	.	12	12	11	11	8	7	5	.	10	10	9	9	6	5	3	310	43.629	0.9377	0.8815	0.8447	5.7366	-0.06429	-0.1261	-0.1688	0.02164
C40-C41	6.9568	8.775	11.262	-0.06006	147.25	2002	129	51.9031	6.6367	8.463	10.86	29553108	27378337	24289082	31358418	4.85981	1.89262	2.13569	2.3851	1	13	13	11	11	8	7	5	.	10	10	9	9	6	5	3	280	44.1964	0.9132	0.8635	0.8239	5.6348	-0.09085	-0.14673	-0.19368	0.06006
C40-C41	6.9568	8.775	11.262	-0.10015	147.25	2003	134	54.3134	5.8115	7.764	10.265	29780450	27589965	24339745	31641630	4.89784	1.75984	2.04946	2.32875	.	13	13	11	11	8	7	5	.	10	10	9	9	6	5	3	305	40.4508	0.9196	0.8819	0.8408	5.7203	-0.08385	-0.12564	-0.17346	0.10015
C40-C41	6.9568	8.775	11.262	-0.07049	147.25	2004	127	51.7165	6.4605	8.143	10.531	30026229	27810425	24409913	31938004	4.84419	1.86571	2.09711	2.3543	.	13	13	11	11	9	8	6	.	10	10	9	9	7	6	4	295	48.0085	0.888	0.8417	0.796	5.687	-0.11874	-0.17233	-0.22818	0.07049
C40-C41	6.9568	8.775	11.262	-0.06881	147.25	2005	146	56.1473	5.9315	7.66	10.173	30275449	28036863	24488083	32242364	4.98361	1.78027	2.03595	2.31976	.	13	13	12	11	11	8	7	.	10	10	10	9	9	6	5	345	44.2391	0.8864	0.8482	0.8133	5.8435	-0.12054	-0.16465	-0.20665	0.06881
C40-C41	6.9568	8.775	11.262	-0.04319	147.25	2006	136	54.2757	6.6079	8.151	10.399	30542403	28260547	24569090	32570505	4.91265	1.88827	2.09813	2.34168	.	13	13	12	11	11	8	7	.	10	10	10	9	9	6	5	300	43.6667	0.8721	0.8339	0.7985	5.7038	-0.13689	-0.18165	-0.22497	0.04319
C40-C41	6.9568	8.775	11.262	0.07221	147.25	2007	159	53.7579	7.6074	9.526	12.172	30809293	28475290	24646922	32887928	5.0689	2.02913	2.254	2.49911	.	13	13	13	11	11	8	7	.	10	10	10	9	9	6	5	360	44.8611	0.901	0.8666	0.8288	5.8861	-0.10424	-0.14316	-0.18772	0.07221
C40-C41	6.9568	8.775	11.262	-0.09827	147.25	2008	143	55.8497	6.1758	7.692	9.965	31119019	28713168	24749702	33245773	4.96284	1.82064	2.04013	2.29908	.	13	13	13	11	11	8	7	.	10	10	10	9	9	6	5	310	47.0161	0.8805	0.835	0.7935	5.7366	-0.12726	-0.18032	-0.23127	0.09827
C40-C41	6.9568	8.775	11.262	0.01038	147.25	2009	147	53.6054	6.8086	8.639	11.086	31459329	28967461	24858115	33628571	4.99043	1.91819	2.15629	2.40566	.	13	13	13	11	11	9	8	.	10	10	10	9	9	7	6	365	44.8288	0.9239	0.881	0.8474	5.8999	-0.07912	-0.12665	-0.16557	0.01038
C40-C41	6.9568	8.775	11.262	0.11106	147.25	2010	183	56.1066	7.7082	9.663	12.465	31788672	29209131	24940838	34005274	5.20949	2.04229	2.26831	2.52294	.	13	13	13	12	11	11	8	.	10	10	10	10	9	9	6	330	46.9697	0.9022	0.8529	0.82	5.7991	-0.10289	-0.1591	-0.19843	0.11106
C40-C41	6.9568	8.775	11.262	0.07362	147.25	2011	166	55.4217	7.6734	9.356	11.737	32079232	29392470	24988937	34342780	5.11199	2.03776	2.23603	2.46271	.	13	13	13	12	11	11	8	.	10	10	10	10	9	9	6	.	.	.	.	.	.	.	.	.	0.07362
C43-C44	8.618	18.71	34.514	-0.08513	1113.5	2000	905	67.5773	9.1441	18.749	33.081	28989695	26842052	24031980	30685730	6.80793	2.21311	2.93112	3.49895	1	14	14	12	12	8	8	4	1	10	10	8	8	5	5	2	4025	58.4006	10.4227	8.5375	6.8287	8.3003	2.34399	2.14446	1.92113	0.08513
C43-C44	8.618	18.71	34.514	-0.06978	1113.5	2001	894	67.5783	8.5573	18.435	32.951	29270445	27108306	24189914	31020596	6.79571	2.14678	2.91427	3.49503	1	15	15	12	12	9	8	6	1	11	11	8	8	6	5	3	4120	58.7075	10.7003	8.7831	6.9525	8.3236	2.37027	2.17283	1.9391	0.06978
C43-C44	8.618	18.71	34.514	0.0167	1113.5	2002	978	67.3875	10.1486	20.692	36.045	29553108	27378337	24289082	31358418	6.88551	2.31734	3.02973	3.58478	1	16	16	12	12	9	8	6	.	11	11	8	8	6	5	3	4035	58.6958	10.8378	8.8705	6.9668	8.3028	2.38304	2.18273	1.94115	0.0167
C43-C44	8.618	18.71	34.514	-0.09344	1113.5	2003	969	68.9551	7.9808	17.407	31.766	29780450	27589965	24339745	31641630	6.87626	2.07704	2.85685	3.45839	.	16	16	12	12	9	8	6	.	11	11	8	8	6	5	3	4300	58.7733	11.1596	9.151	7.1304	8.3664	2.4123	2.21386	1.96436	0.09344
C43-C44	8.618	18.71	34.514	-0.06224	1113.5	2004	1012	68.9007	8.5006	17.817	32.638	30026229	27810425	24409913	31938004	6.91968	2.14014	2.88016	3.48548	.	16	16	13	12	10	8	7	.	11	11	9	8	6	5	4	4420	59.8473	11.2576	9.2248	7.1622	8.3939	2.42104	2.22189	1.96882	0.06224
C43-C44	8.618	18.71	34.514	-0.03429	1113.5	2005	1018	69.4032	8.5348	18.039	32.369	30275449	28036863	24488083	32242364	6.9256	2.14415	2.89252	3.47722	.	16	16	14	12	12	8	8	.	11	11	10	8	8	5	5	4585	59.8228	11.3839	9.3511	7.2049	8.4305	2.4322	2.23549	1.97476	0.03429
C43-C44	8.618	18.71	34.514	0.01886	1113.5	2006	1129	69.7276	8.3947	18.427	34.01	30542403	28260547	24569090	32570505	7.02909	2.1276	2.9138	3.52666	.	16	16	15	12	12	9	8	.	11	11	11	8	8	6	5	4885	60.2482	11.6044	9.4945	7.2683	8.4939	2.45138	2.25071	1.98353	0.01886
C43-C44	8.618	18.71	34.514	0.0286	1113.5	2007	1169	69.3948	8.6319	19.131	35.817	30809293	28475290	24646922	32887928	7.0639	2.15547	2.95129	3.57843	.	16	16	16	12	12	9	8	.	11	11	11	8	8	6	5	5130	61.0088	11.9664	9.777	7.4062	8.5429	2.4821	2.28004	2.00232	0.0286
C43-C44	8.618	18.71	34.514	0.08616	1113.5	2008	1211	69.4405	9.4951	20.095	36.834	31119019	28713168	24749702	33245773	7.0992	2.25077	3.00049	3.60643	.	16	16	16	12	12	9	8	.	11	11	11	8	8	6	5	5550	61.4595	12.3781	10.0199	7.4789	8.6216	2.51593	2.30458	2.01209	0.08616
C43-C44	8.618	18.71	34.514	0.17332	1113.5	2009	1389	69.9842	8.9588	21.125	40.106	31459329	28967461	24858115	33628571	7.23634	2.19264	3.05048	3.69152	1	17	17	16	13	12	10	8	1	12	12	11	9	8	6	5	5895	61.5161	12.9579	10.3971	7.6824	8.6819	2.56171	2.34152	2.03893	0.17332
C43-C44	8.618	18.71	34.514	0.02534	1113.5	2010	1359	71.117	7.7965	17.673	35.168	31788672	29209131	24940838	34005274	7.2145	2.05367	2.87201	3.56014	.	17	17	16	14	12	12	8	.	12	12	11	10	8	8	5	5820	61.9459	13.3362	10.6584	7.7478	8.6691	2.59048	2.36635	2.0474	0.02534
C43-C44	8.618	18.71	34.514	-0.00411	1113.5	2011	1329	71.2453	7.2732	16.935	33.378	32079232	29392470	24988937	34342780	7.19218	1.9842	2.82936	3.50791	.	17	17	16	15	12	12	9	.	12	12	11	11	8	8	6	.	.	.	.	.	.	.	.	.	0.00411
C45-C49	9.045	16.25	29.215	-0.08879	883.67	2000	741	66.2173	8.3035	15.696	27.9	28989695	26842052	24031980	30685730	6.608	2.11668	2.75338	3.32861	1	22	22	21	19	15	13	9	1	15	15	14	13	10	9	6	1225	59.5408	3.3278	2.5777	1.9782	7.1107	1.20231	0.9469	0.68216	0.08879
C45-C49	9.045	16.25	29.215	-0.06638	883.67	2001	724	65.8432	8.2865	15.676	27.987	29270445	27108306	24189914	31020596	6.58479	2.11463	2.75213	3.33175	.	22	22	21	19	15	13	11	.	15	15	14	13	10	9	7	1235	59.1599	3.2623	2.4847	1.8821	7.1188	1.18243	0.91016	0.63241	0.06638
C45-C49	9.045	16.25	29.215	-0.01479	883.67	2002	772	65.8517	8.8723	16.665	29.565	29553108	27378337	24289082	31358418	6.64898	2.18293	2.81329	3.38661	1	23	23	21	21	15	13	11	.	15	15	14	14	10	9	7	1310	58.1679	3.2515	2.4992	1.88	7.1778	1.17912	0.91597	0.63127	0.01479
C45-C49	9.045	16.25	29.215	-0.02282	883.67	2003	809	67.0352	8.7347	16.214	28.856	29780450	27589965	24339745	31641630	6.6958	2.1673	2.78589	3.36232	.	23	23	21	21	15	13	11	.	15	15	14	14	10	9	7	1350	60.2778	3.2586	2.5112	1.8796	7.2079	1.18131	0.92077	0.63108	0.02282
C45-C49	9.045	16.25	29.215	0.07435	883.67	2004	856	66.198	10.6801	18.337	31.671	30026229	27810425	24409913	31938004	6.75227	2.36838	2.9089	3.45539	1	24	24	21	21	17	14	12	.	15	15	14	14	11	10	8	1355	60.8026	3.2851	2.5083	1.876	7.2116	1.18938	0.91962	0.62912	0.07435
C45-C49	9.045	16.25	29.215	-0.03451	883.67	2005	875	68.2531	7.7936	14.832	27.393	30275449	28036863	24488083	32242364	6.77422	2.0533	2.6968	3.31031	1	25	25	22	21	19	15	13	1	16	16	15	14	13	10	9	1555	61.037	3.3865	2.5947	1.9346	7.3492	1.21979	0.95347	0.65992	0.03451
C45-C49	9.045	16.25	29.215	-0.03537	883.67	2006	903	68.6561	7.2896	14.273	27.269	30542403	28260547	24569090	32570505	6.80572	1.98646	2.65834	3.30574	.	25	25	22	21	19	15	13	.	16	16	15	14	13	10	9	1605	60.7866	3.5036	2.6741	1.9859	7.3809	1.2538	0.9836	0.68609	0.03537
C45-C49	9.045	16.25	29.215	-0.01839	883.67	2007	931	68.0994	8.9545	15.898	28.926	30809293	28475290	24646922	32887928	6.83626	2.19215	2.76619	3.36475	.	25	25	23	21	21	15	13	.	16	16	15	14	14	10	9	1695	61.3201	3.6221	2.7125	2.0044	7.4354	1.28706	0.99788	0.69532	0.01839
C45-C49	9.045	16.25	29.215	0.07531	883.67	2008	971	68.053	10.7294	17.424	30.843	31119019	28713168	24749702	33245773	6.87833	2.37299	2.85785	3.42891	.	25	25	23	21	21	15	13	.	16	16	15	14	14	10	9	1755	61.3177	3.7514	2.8077	2.0627	7.4702	1.32213	1.03238	0.72404	0.07531
C45-C49	9.045	16.25	29.215	0.08089	883.67	2009	984	67.9654	9.3511	16.897	30.951	31459329	28967461	24858115	33628571	6.89163	2.23549	2.82711	3.43241	.	25	25	24	21	21	17	14	.	16	16	15	14	14	11	10	1610	62.0342	3.788	2.8367	2.0884	7.384	1.33183	1.04264	0.73638	0.08089
C45-C49	9.045	16.25	29.215	0.1243	883.67	2010	1046	67.9685	11.2767	18.838	32.865	31788672	29209131	24940838	34005274	6.95273	2.42274	2.93589	3.49242	1	26	26	25	22	21	19	15	1	17	17	16	15	14	13	10	1730	61.8353	3.8028	2.8412	2.0808	7.4559	1.33573	1.04422	0.73275	0.1243
C45-C49	9.045	16.25	29.215	-0.07379	883.67	2011	992	69.9133	8.2677	14.25	26.352	32079232	29392470	24988937	34342780	6.89972	2.11235	2.65677	3.27154	.	26	26	25	22	21	19	15	.	17	17	16	15	14	13	10	.	.	.	.	.	.	.	.	.	0.07379
C50-C50	31.8826	80.762	156.079	0.03522	5009	2000	4901	68.3371	36.4098	89.645	168.75	28989695	26842052	24031980	30685730	8.49719	3.59484	4.49586	5.12842	2	35	35	27	19	16	10	6	.	18	18	17	14	12	9	5	18895	61.9893	50.3909	39.1363	26.7789	9.8467	3.91981	3.66705	3.28762	0.03522
C50-C50	31.8826	80.762	156.079	0.06544	5009	2001	5017	68.4792	37.1126	90.609	170.607	29270445	27108306	24189914	31020596	8.52059	3.61396	4.50655	5.13936	.	35	35	29	19	16	11	7	.	18	18	17	14	12	10	6	19035	61.8998	51.1632	40.0819	27.3225	9.854	3.93502	3.69093	3.30771	0.06544
C50-C50	31.8826	80.762	156.079	0.02247	5009	2002	5017	68.8494	34.1614	85.843	163.968	29553108	27378337	24289082	31358418	8.52059	3.5311	4.45252	5.09967	1	36	36	31	22	16	12	8	.	18	18	17	16	12	11	7	19795	61.7561	51.9294	40.9571	27.6985	9.8932	3.94989	3.71252	3.32138	0.02247
C50-C50	31.8826	80.762	156.079	0.04184	5009	2003	5097	69.0519	33.4535	85.402	164.479	29780450	27589965	24339745	31641630	8.53641	3.51016	4.44737	5.10278	1	37	37	32	22	16	12	8	1	19	19	17	16	12	11	7	19245	61.9674	51.9051	41.2316	27.7709	9.865	3.94942	3.7192	3.32399	0.04184
C50-C50	31.8826	80.762	156.079	0.02777	5009	2004	4998	68.9026	33.511	84.618	161.517	30026229	27810425	24409913	31938004	8.51679	3.51187	4.43814	5.08461	.	37	37	33	25	17	14	9	.	19	19	18	17	12	11	8	19815	61.9764	51.6923	41.3756	27.7328	9.8942	3.94531	3.72269	3.32262	0.02777
C50-C50	31.8826	80.762	156.079	0.02898	5009	2005	5045	69.4078	31.9135	80.635	155.96	30275449	28036863	24488083	32242364	8.52615	3.46303	4.38993	5.0496	1	38	38	35	27	19	16	10	.	19	19	18	17	14	12	9	20375	61.8043	52.0326	41.8578	28.0551	9.9221	3.95187	3.73428	3.33417	0.02898
C50-C50	31.8826	80.762	156.079	-0.00537	5009	2006	4897	69.2756	28.5114	75.874	150.136	30542403	28260547	24569090	32570505	8.49638	3.35031	4.32908	5.01154	.	38	38	35	29	19	16	11	.	19	19	18	17	14	12	10	20800	61.9387	52.5423	42.3993	28.373	9.9427	3.96162	3.74713	3.34544	0.00537
C50-C50	31.8826	80.762	156.079	-0.01262	5009	2007	5105	69.5005	30.8456	79.657	155.448	30809293	28475290	24646922	32887928	8.53798	3.429	4.37773	5.04631	.	38	38	36	31	22	16	12	.	19	19	18	17	16	12	11	21315	62.317	52.7832	42.5648	28.3676	9.9672	3.96619	3.75103	3.34525	0.01262
C50-C50	31.8826	80.762	156.079	0.00958	5009	2008	5006	69.2179	32.1418	80.137	154.311	31119019	28713168	24749702	33245773	8.51839	3.47016	4.38374	5.03897	.	38	38	37	32	22	16	12	.	19	19	19	17	16	12	11	21335	62.1672	53.4377	43.0982	28.7267	9.9681	3.97852	3.76348	3.35783	0.00958
C50-C50	31.8826	80.762	156.079	-0.03976	5009	2009	4990	69.6748	30.6137	75.481	146.578	31459329	28967461	24858115	33628571	8.51519	3.42145	4.32388	4.98756	1	39	39	37	33	25	17	14	1	20	20	19	18	17	12	11	22255	62.3663	54.3014	43.616	28.8984	10.0103	3.99455	3.77543	3.36379	0.03976
C50-C50	31.8826	80.762	156.079	-0.07998	5009	2010	5024	70.0144	27.5753	72.28	143.156	31788672	29209131	24940838	34005274	8.52198	3.31692	4.28055	4.96394	.	39	39	38	35	27	19	16	.	20	20	19	18	17	14	12	22835	62.2559	55.2121	44.1514	28.9492	10.036	4.01118	3.78762	3.36554	0.07998
C50-C50	31.8826	80.762	156.079	-0.09358	5009	2011	5011	70.2045	26.3417	68.963	138.041	32079232	29392470	24988937	34342780	8.51939	3.27115	4.23357	4.92755	1	40	40	38	35	29	19	16	1	21	21	19	18	17	14	12	.	.	.	.	.	.	.	.	.	0.09358
C51-C58	16.5024	41.418	83.356	-0.0611	2915	2000	2603	69.1711	18.9019	43.16	81.986	28989695	26842052	24031980	30685730	7.86442	2.93926	3.76491	4.40655	1	27	27	23	20	16	11	8	1	18	18	17	15	13	10	7	7710	61.7218	20.2428	15.4584	10.3823	8.9503	3.0078	2.73815	2.3401	0.0611
C51-C58	16.5024	41.418	83.356	-0.05063	2915	2001	2681	69.4424	17.7967	42.229	81.268	29270445	27108306	24189914	31020596	7.89395	2.87901	3.7431	4.39775	.	27	27	25	20	17	12	9	.	18	18	17	15	13	11	8	7740	61.6925	20.388	15.7473	10.544	8.9542	3.01495	2.75667	2.35556	0.05063
C51-C58	16.5024	41.418	83.356	-0.04209	2915	2002	2797	69.588	16.458	40.671	82.233	29553108	27378337	24289082	31358418	7.9363	2.80081	3.70551	4.40956	1	28	28	26	22	17	12	9	.	18	18	17	16	13	11	8	8105	62.0312	20.5639	15.9975	10.6563	9.0002	3.02354	2.77243	2.36615	0.04209
C51-C58	16.5024	41.418	83.356	0.01519	2915	2003	2852	69.3987	17.3995	43.313	85.677	29780450	27589965	24339745	31641630	7.95578	2.85644	3.76845	4.45058	.	28	28	26	22	17	12	9	.	18	18	17	16	13	11	8	8245	61.6813	20.8658	16.3835	10.8318	9.0174	3.03811	2.79627	2.38249	0.01519
C51-C58	16.5024	41.418	83.356	-0.01172	2915	2004	2882	69.8482	17.3188	41.81	83.061	30026229	27810425	24409913	31938004	7.96624	2.85179	3.73313	4.41957	.	28	28	26	22	18	14	10	.	18	18	17	16	13	12	9	8205	61.9241	21.0161	16.5978	10.8563	9.0125	3.04529	2.80927	2.38474	0.01172
C51-C58	16.5024	41.418	83.356	0.02948	2915	2005	2852	69.4066	15.9159	41.347	83.475	30275449	28036863	24488083	32242364	7.95578	2.76732	3.72201	4.42455	.	28	28	27	23	20	16	11	.	18	18	18	17	15	13	10	8565	61.7119	21.3033	16.9132	10.9799	9.0554	3.05886	2.82809	2.39606	0.02948
C51-C58	16.5024	41.418	83.356	0.04768	2915	2006	2903	69.4368	15.8634	41.666	84.694	30542403	28260547	24569090	32570505	7.9735	2.76402	3.72968	4.43904	1	29	29	27	25	20	17	12	1	19	19	18	17	15	13	11	8730	61.618	21.7055	17.3193	11.1216	9.0745	3.07757	2.85182	2.40889	0.04768
C51-C58	16.5024	41.418	83.356	-0.02658	2915	2007	2941	70.1408	16.2637	40.67	82.008	30809293	28475290	24646922	32887928	7.9865	2.78894	3.7055	4.40681	.	29	29	28	26	22	17	12	.	19	19	18	17	16	13	11	9195	62.0024	22.1505	17.7709	11.3009	9.1264	3.09786	2.87756	2.42488	0.02658
C51-C58	16.5024	41.418	83.356	-0.00697	2915	2008	2994	70.1344	15.0204	39.485	81.196	31119019	28713168	24749702	33245773	8.00437	2.70941	3.67593	4.39687	.	29	29	28	26	22	17	12	.	19	19	18	17	16	13	11	9190	62.1001	22.4428	18.0221	11.3894	9.1259	3.11097	2.8916	2.43268	0.00697
C51-C58	16.5024	41.418	83.356	0.02027	2915	2009	3070	70.0855	15.1962	40.157	83.266	31459329	28967461	24858115	33628571	8.02943	2.72105	3.6928	4.42204	.	29	29	28	26	22	18	14	.	19	19	18	17	16	13	12	9635	61.6619	23.095	18.5819	11.6682	9.1732	3.13962	2.92219	2.45686	0.02027
C51-C58	16.5024	41.418	83.356	-0.0056	2915	2010	3166	70.4588	15.4065	39.542	82.498	31788672	29209131	24940838	34005274	8.06022	2.73479	3.67737	4.41277	2	31	31	28	27	23	20	16	1	20	20	18	18	17	15	13	9990	61.4464	23.7752	19.1551	11.96	9.2093	3.16864	2.95257	2.48156	0.0056
C51-C58	16.5024	41.418	83.356	0.09207	2915	2011	3239	69.6264	16.4873	42.962	88.913	32079232	29392470	24988937	34342780	8.08302	2.80259	3.76031	4.48765	.	31	31	29	27	25	20	17	.	20	20	19	18	17	15	13	.	.	.	.	.	.	.	.	.	0.09207
C60-C63	3.0612	8.952	29.902	0.05989	3769.67	2000	3791	78.2564	2.9856	8.941	33.115	28989695	26842052	24031980	30685730	8.24039	1.0938	2.19067	3.49999	1	26	26	23	18	13	8	6	1	20	20	19	16	13	8	6	19565	68.6564	42.9655	19.919	6.4462	9.8815	3.7604	2.99167	1.86349	0.05989
C60-C63	3.0612	8.952	29.902	0.03938	3769.67	2001	3884	78.553	2.7284	8.567	31.824	29270445	27108306	24189914	31020596	8.26462	1.00372	2.14797	3.46022	.	26	26	24	18	13	9	6	.	20	20	19	16	13	9	6	21480	68.2216	45.8594	21.8789	7.0888	9.9749	3.82558	3.08552	1.95851	0.03938
C60-C63	3.0612	8.952	29.902	0.07163	3769.67	2002	3779	78.5009	2.532	9.314	32.975	29553108	27378337	24289082	31358418	8.23721	0.92901	2.23151	3.49574	1	27	27	24	20	14	9	6	.	20	20	19	17	14	9	6	20605	67.9659	47.757	23.517	7.6383	9.9333	3.86613	3.15772	2.03318	0.07163
C60-C63	3.0612	8.952	29.902	0.05869	3769.67	2003	3736	78.756	3.3998	9.56	32.026	29780450	27589965	24339745	31641630	8.22577	1.22371	2.25755	3.46655	.	27	27	24	21	15	9	6	.	20	20	19	18	14	9	6	20650	67.914	49.4556	25.0461	8.2226	9.9355	3.90107	3.22072	2.10688	0.05869
C60-C63	3.0612	8.952	29.902	-0.02052	3769.67	2004	3756	79.1713	3.4617	9.25	29.466	30026229	27810425	24409913	31938004	8.23111	1.24176	2.22464	3.38323	.	27	27	25	22	16	11	7	.	20	20	19	18	14	11	7	21705	67.5933	51.0762	26.6614	8.742	9.9853	3.93332	3.28322	2.16814	0.02052
C60-C63	3.0612	8.952	29.902	0.07358	3769.67	2005	3659	78.9676	3.9611	10.549	31.222	30275449	28036863	24488083	32242364	8.20495	1.37652	2.35599	3.44111	.	27	27	26	23	18	13	8	.	20	20	20	19	16	13	8	22185	67.5079	52.3349	28.0936	9.1999	10.0072	3.95766	3.33554	2.21919	0.07358
C60-C63	3.0612	8.952	29.902	-0.02717	3769.67	2006	3633	79.4123	3.2052	8.669	28.125	30542403	28260547	24569090	32570505	8.19781	1.16479	2.15979	3.33665	.	27	27	26	24	18	13	9	.	20	20	20	19	16	13	9	23690	67.2932	53.3133	29.3892	9.6087	10.0728	3.97619	3.38063	2.26267	0.02717
C60-C63	3.0612	8.952	29.902	-0.11586	3769.67	2007	3697	79.7194	2.617	7.875	26.843	30809293	28475290	24646922	32887928	8.21528	0.96201	2.06372	3.28999	.	27	27	27	24	20	14	9	.	20	20	20	19	17	14	9	24410	67.1129	55.1584	31.0276	10.0374	10.1027	4.01021	3.43488	2.30632	0.11586
C60-C63	3.0612	8.952	29.902	0.00617	3769.67	2008	3801	79.4574	3.0909	9.081	29.443	31119019	28713168	24749702	33245773	8.24302	1.12848	2.20621	3.38247	.	27	27	27	24	21	15	9	.	20	20	20	19	18	14	9	23260	66.9218	56.3181	32.2916	10.5124	10.0545	4.03102	3.47481	2.35255	0.00617
C60-C63	3.0612	8.952	29.902	-0.06658	3769.67	2009	3803	79.7785	2.2628	7.949	27.321	31459329	28967461	24858115	33628571	8.24355	0.81662	2.07299	3.30766	1	28	28	27	25	22	16	11	1	21	21	20	19	18	14	11	23475	66.9696	56.9903	33.1163	10.8077	10.0637	4.04288	3.50003	2.38026	0.06658
C60-C63	3.0612	8.952	29.902	-0.01261	3769.67	2010	3923	79.7846	3.6386	9.475	29.319	31788672	29209131	24940838	34005274	8.27461	1.2916	2.24863	3.37822	.	28	28	27	26	23	18	13	.	21	21	20	20	19	16	13	23095	66.8938	57.1958	33.5538	10.9965	10.0474	4.04648	3.51315	2.39758	0.01261
C60-C63	3.0612	8.952	29.902	-0.06661	3769.67	2011	3774	79.9265	2.8513	8.191	27.152	32079232	29392470	24988937	34342780	8.23589	1.04776	2.10302	3.30143	1	29	29	27	26	24	18	13	.	21	21	20	20	19	16	13	.	.	.	.	.	.	.	.	.	0.06661
C64-C68	7.5802	23.281	56.912	-0.03315	3288.83	2000	2847	73.4721	8.9776	24.737	57.546	28989695	26842052	24031980	30685730	7.95402	2.19473	3.20831	4.05259	1	20	20	18	17	13	9	5	1	18	18	16	16	12	9	5	9635	68.4237	21.2467	12.2563	6.3196	9.1732	3.0562	2.50604	1.84366	0.03315
C64-C68	7.5802	23.281	56.912	-0.0446	3288.83	2001	2888	73.8203	9.0306	24.317	55.805	29270445	27108306	24189914	31020596	7.96832	2.20062	3.19119	4.02187	.	20	20	19	17	13	9	6	.	18	18	17	16	12	9	6	9875	68.1987	21.5539	12.5397	6.4883	9.1978	3.07056	2.5289	1.87	0.0446
C64-C68	7.5802	23.281	56.912	-0.06563	3288.83	2002	2965	73.9648	7.1617	22.361	54.823	29553108	27378337	24289082	31358418	7.99463	1.96874	3.10731	4.00412	1	21	21	19	18	13	9	7	.	18	18	17	16	12	9	7	10195	68.1327	21.8293	12.824	6.6427	9.2297	3.08325	2.55132	1.89352	0.06563
C64-C68	7.5802	23.281	56.912	-0.0183	3288.83	2003	3064	73.884	7.1776	22.751	56.554	29780450	27589965	24339745	31641630	8.02748	1.97096	3.12461	4.03519	.	21	21	19	18	13	9	7	.	18	18	17	16	12	9	7	10510	68.6013	22.154	13.0794	6.6171	9.2601	3.09802	2.57104	1.88966	0.0183
C64-C68	7.5802	23.281	56.912	0.03568	3288.83	2004	3207	73.9875	8.7649	25.276	59.446	30026229	27810425	24409913	31938004	8.07309	2.17075	3.22987	4.08507	.	21	21	19	18	14	11	8	.	18	18	17	16	13	11	8	10840	68.5355	22.3882	13.3299	6.6545	9.291	3.10853	2.59001	1.89529	0.03568
C64-C68	7.5802	23.281	56.912	0.01096	3288.83	2005	3188	74.508	7.8855	23.624	55.931	30275449	28036863	24488083	32242364	8.06715	2.06502	3.16227	4.02413	1	22	22	20	18	17	13	9	1	19	19	18	16	16	12	9	11005	68.9175	22.6684	13.6344	6.7042	9.3061	3.12097	2.61259	1.90273	0.01096
C64-C68	7.5802	23.281	56.912	0.0045	3288.83	2006	3281	74.8423	6.5937	22.346	55.366	30542403	28260547	24569090	32570505	8.0959	1.88611	3.10663	4.01396	.	22	22	20	19	17	13	9	.	19	19	18	17	16	12	9	11495	68.507	23.0614	14.0016	6.8096	9.3497	3.13816	2.63917	1.91833	0.0045
C64-C68	7.5802	23.281	56.912	-0.06446	3288.83	2007	3380	75.157	6.6114	21.482	53.894	30809293	28475290	24646922	32887928	8.12563	1.88879	3.06721	3.98703	.	22	22	21	19	18	13	9	.	19	19	18	17	16	12	9	12000	68.6104	23.4544	14.4103	6.9276	9.3927	3.15506	2.66795	1.93551	0.06446
C64-C68	7.5802	23.281	56.912	0.07335	3288.83	2008	3667	74.8578	7.7435	23.836	60.057	31119019	28713168	24749702	33245773	8.20713	2.04686	3.17119	4.09529	.	22	22	21	19	18	13	9	.	19	19	18	17	16	12	9	12190	68.7838	23.8536	14.7634	7.072	9.4084	3.17193	2.69215	1.95614	0.07335
C64-C68	7.5802	23.281	56.912	0.07933	3288.83	2009	3633	75.0606	8.6994	25.313	60.292	31459329	28967461	24858115	33628571	8.19781	2.16325	3.23131	4.0992	.	22	22	21	19	18	14	11	.	19	19	18	17	16	13	11	12590	68.9873	24.2977	15.1176	7.1438	9.4407	3.19038	2.71586	1.96624	0.07933
C64-C68	7.5802	23.281	56.912	0.00826	3288.83	2010	3727	75.4306	5.8238	21.757	57.096	31788672	29209131	24940838	34005274	8.22336	1.76195	3.07993	4.04473	1	23	23	22	20	18	17	13	1	20	20	19	18	16	16	12	12615	68.6692	24.8413	15.5399	7.3041	9.4426	3.21251	2.74341	1.98844	0.00826
C64-C68	7.5802	23.281	56.912	0.01407	3288.83	2011	3619	75.304	6.4929	21.57	56.134	32079232	29392470	24988937	34342780	8.19395	1.87071	3.07131	4.02775	.	23	23	22	20	19	17	13	.	20	20	19	18	17	16	12	.	.	.	.	.	.	.	.	.	0.01407
C69-C72	29.4768	50.546	82.826	-0.01647	1732.83	2000	1565	60.6914	30.295	53.053	85.17	28989695	26842052	24031980	30685730	7.35564	3.41098	3.97129	4.44465	1	17	17	15	15	13	12	9	1	12	12	10	10	8	7	5	2610	54.933	7.2169	5.8441	4.6305	7.8671	1.97642	1.76544	1.53266	0.01647
C69-C72	29.4768	50.546	82.826	0.00694	1732.83	2001	1580	60.5709	32.2986	54.146	85.523	29270445	27108306	24189914	31020596	7.36518	3.47502	3.99168	4.44879	.	17	17	15	15	13	12	10	.	12	12	10	10	8	7	5	2515	55.1044	7.1456	5.7671	4.5871	7.83	1.9665	1.75218	1.52324	0.00694
C69-C72	29.4768	50.546	82.826	-0.09415	1732.83	2002	1557	61.7714	27.1706	47.289	77.554	29553108	27378337	24289082	31358418	7.35052	3.30214	3.85628	4.35097	1	18	18	15	15	13	12	10	.	12	12	10	10	8	7	5	2560	55.1855	7.0907	5.7639	4.5516	7.8478	1.95878	1.75161	1.51548	0.09415
C69-C72	29.4768	50.546	82.826	-0.06138	1732.83	2003	1621	62.0694	27.6626	47.791	78.845	29780450	27589965	24339745	31641630	7.3908	3.32008	3.86684	4.36749	.	18	18	15	15	13	12	10	.	12	12	10	10	8	7	5	2640	56.25	7.1002	5.7414	4.5143	7.8785	1.96012	1.74771	1.50725	0.06138
C69-C72	29.4768	50.546	82.826	-0.01659	1732.83	2004	1636	61.4655	29.5679	50.584	82.12	30026229	27810425	24409913	31938004	7.40001	3.38669	3.92363	4.40818	.	18	18	16	15	13	13	11	.	12	12	11	10	8	8	6	2490	55.512	6.9963	5.673	4.4581	7.82	1.94537	1.73572	1.49473	0.01659
C69-C72	29.4768	50.546	82.826	0.02015	1732.83	2005	1609	61.1451	31.1274	51.548	82.162	30275449	28036863	24488083	32242364	7.38337	3.43809	3.94252	4.4087	.	18	18	17	15	15	13	12	.	12	12	12	10	10	8	7	2755	55.4401	7.0038	5.694	4.4323	7.9212	1.94645	1.73942	1.48892	0.02015
C69-C72	29.4768	50.546	82.826	0.04709	1732.83	2006	1700	61.5918	31.041	51.942	84.093	30542403	28260547	24569090	32570505	7.43838	3.43531	3.95012	4.43192	.	18	18	17	15	15	13	12	.	12	12	12	10	10	8	7	2730	56.1081	7.0571	5.7617	4.4389	7.9121	1.95403	1.75123	1.4904	0.04709
C69-C72	29.4768	50.546	82.826	-0.01555	1732.83	2007	1786	62.598	28.3301	49.85	82.378	30809293	28475290	24646922	32887928	7.48773	3.34393	3.90902	4.41132	.	18	18	18	15	15	13	12	.	12	12	12	10	10	8	7	2865	56.9764	7.1365	5.8125	4.4586	7.9603	1.96523	1.76001	1.49484	0.01555
C69-C72	29.4768	50.546	82.826	0.05853	1732.83	2008	1908	62.7909	29.1317	51.083	86.129	31119019	28713168	24749702	33245773	7.55381	3.37183	3.93345	4.45585	.	18	18	18	15	15	13	12	.	12	12	12	10	10	8	7	2910	55.6271	7.2233	5.9289	4.5167	7.9759	1.97731	1.77983	1.50778	0.05853
C69-C72	29.4768	50.546	82.826	0.02242	1732.83	2009	1897	63.1244	29.2379	49.756	82.902	31459329	28967461	24858115	33628571	7.54803	3.37547	3.90713	4.41766	.	18	18	18	16	15	13	13	.	12	12	12	11	10	8	8	2975	55.895	7.3914	6.064	4.6179	7.998	2.00032	1.80237	1.52995	0.02242
C69-C72	29.4768	50.546	82.826	0.0019	1732.83	2010	1940	63.5642	28.9104	49.284	82.578	31788672	29209131	24940838	34005274	7.57044	3.3642	3.8976	4.41375	.	18	18	18	17	15	15	13	.	12	12	12	12	10	10	8	2945	56.9143	7.3847	6.0603	4.6012	7.9879	1.99941	1.80175	1.52631	0.0019
C69-C72	29.4768	50.546	82.826	0.04712	1732.83	2011	1995	63.5995	28.9488	50.231	84.452	32079232	29392470	24988937	34342780	7.5984	3.36553	3.91662	4.43618	.	18	18	18	17	15	15	13	.	12	12	12	12	10	10	8	.	.	.	.	.	.	.	.	.	0.04712
C73-C75	5.0962	7.023	10.37	0.00812	244.08	2000	202	62.1955	5.7174	7.755	10.862	28989695	26842052	24031980	30685730	5.30827	1.74351	2.04829	2.38531	1	11	11	10	10	8	6	3	1	10	10	9	9	7	5	2	2455	48.223	6.6274	6.2144	5.7106	7.8059	1.89121	1.82687	1.74233	0.00812
C73-C75	5.0962	7.023	10.37	0.05851	244.08	2001	215	62.5	5.8909	8.014	11.206	29270445	27108306	24189914	31020596	5.37064	1.77341	2.08121	2.41644	.	11	11	10	10	8	6	3	.	10	10	9	9	7	5	2	2645	48.4546	7.1285	6.721	6.1777	7.8804	1.9641	1.90524	1.82095	0.05851
C73-C75	5.0962	7.023	10.37	0.09122	244.08	2002	221	62.2941	6.1365	8.284	11.616	29553108	27378337	24289082	31358418	5.39816	1.81425	2.11432	2.45242	1	12	12	10	10	8	6	3	.	10	10	9	9	7	5	2	3120	48.2292	7.9095	7.5199	6.9101	8.0456	2.06807	2.01755	1.93299	0.09122
C73-C75	5.0962	7.023	10.37	-0.01423	244.08	2003	226	64.7323	5.0452	6.988	10.285	29780450	27589965	24339745	31641630	5.42053	1.61845	1.9442	2.33071	.	12	12	10	10	8	7	3	.	10	10	9	9	7	6	2	3155	48.6965	8.637	8.2273	7.534	8.0567	2.15606	2.10746	2.01943	0.01423
C73-C75	5.0962	7.023	10.37	-0.08238	244.08	2004	251	66.9502	3.7505	6.043	9.568	30026229	27810425	24409913	31938004	5.52545	1.3219	1.79885	2.25846	1	13	13	10	10	8	8	5	1	11	11	9	9	7	7	4	3515	48.894	9.3719	8.9459	8.2005	8.1648	2.23772	2.19119	2.10419	0.08238
C73-C75	5.0962	7.023	10.37	-0.20698	244.08	2005	224	67.0469	3.5793	5.195	8.147	30275449	28036863	24488083	32242364	5.41165	1.27517	1.64769	2.09763	.	13	13	11	10	10	8	6	.	11	11	10	9	9	7	5	4100	49.2195	10.316	9.8778	8.9999	8.3187	2.3337	2.29029	2.19721	0.20698
C73-C75	5.0962	7.023	10.37	-0.0086	244.08	2006	246	65.7907	4.6318	6.442	9.898	30542403	28260547	24569090	32570505	5.50533	1.53295	1.86281	2.2923	.	13	13	11	10	10	8	6	.	11	11	10	9	9	7	5	4145	50.1055	11.1702	10.687	9.6568	8.3297	2.41325	2.36903	2.26766	0.0086
C73-C75	5.0962	7.023	10.37	0.20547	244.08	2007	265	62.8038	6.8244	8.988	12.787	30809293	28475290	24646922	32887928	5.57973	1.9205	2.19595	2.54841	.	13	13	12	10	10	8	6	.	11	11	10	9	9	7	5	4450	50.073	11.8882	11.3657	10.1876	8.4007	2.47554	2.4306	2.32117	0.20547
C73-C75	5.0962	7.023	10.37	-0.08825	244.08	2008	247	67.0749	4.5051	6.156	9.255	31119019	28713168	24749702	33245773	5.50939	1.50521	1.81738	2.22514	.	13	13	12	10	10	8	7	.	11	11	10	9	9	7	6	4855	50.6771	12.7988	12.1967	10.874	8.4878	2.54936	2.50117	2.38637	0.08825
C73-C75	5.0962	7.023	10.37	-0.07338	244.08	2009	274	68.4617	4.0389	5.908	9.374	31459329	28967461	24858115	33628571	5.61313	1.39598	1.77637	2.23794	.	13	13	13	10	10	8	8	.	11	11	11	9	9	7	7	5045	50.2502	13.634	12.9733	11.4915	8.5262	2.61257	2.56289	2.44161	0.07338
C73-C75	5.0962	7.023	10.37	0.00736	244.08	2010	286	67.6941	5.09	6.837	10.332	31788672	29209131	24940838	34005274	5.65599	1.62729	1.92233	2.33527	.	13	13	13	11	10	10	8	.	11	11	11	10	9	9	7	5285	50.8491	14.2159	13.4687	11.8652	8.5726	2.65436	2.60037	2.47361	0.00736
C73-C75	5.0962	7.023	10.37	0.10314	244.08	2011	272	65.4669	5.9446	7.665	11.115	32079232	29392470	24988937	34342780	5.6058	1.78249	2.03669	2.40827	.	13	13	13	11	10	10	8	.	11	11	11	10	9	9	7	.	.	.	.	.	.	.	.	.	0.10314
C76-C80	11.7059	32.448	74.936	0.05177	4030.33	2000	3949	73.0889	12.6477	35.26	82.157	28989695	26842052	24031980	30685730	8.28122	2.53748	3.56275	4.40863	1	39	39	31	25	20	15	11	.	23	23	22	18	14	10	7	5565	71.4398	10.0175	5.3397	2.7501	8.6243	2.30433	1.67517	1.01165	0.05177
C76-C80	11.7059	32.448	74.936	0.08863	4030.33	2001	3989	73.0021	13.4023	36.518	83.615	29270445	27108306	24189914	31020596	8.2913	2.59542	3.59781	4.42622	.	39	39	33	25	21	16	12	.	23	23	22	18	15	11	8	5980	71.4967	10.0951	5.4866	2.8463	8.6962	2.31205	1.70231	1.04604	0.08863
C76-C80	11.7059	32.448	74.936	0.10833	4030.33	2002	4043	73.1282	15.439	38.936	85.558	29553108	27378337	24289082	31358418	8.30474	2.7369	3.66192	4.44919	1	40	40	36	27	21	17	13	.	23	23	22	20	15	12	8	5900	71.5593	10.2025	5.6043	2.9111	8.6827	2.32263	1.72354	1.06852	0.10833
C76-C80	11.7059	32.448	74.936	0.0085	4030.33	2003	3934	73.7686	12.6624	33.824	76.181	29780450	27589965	24339745	31641630	8.27741	2.53864	3.52117	4.33311	1	41	41	37	27	21	18	13	1	24	24	22	20	15	13	8	6280	71.6879	10.3495	5.7448	3.0052	8.7451	2.33694	1.7483	1.10035	0.0085
C76-C80	11.7059	32.448	74.936	0.07107	4030.33	2004	3918	73.1294	12.8288	35.469	80.768	30026229	27810425	24409913	31938004	8.27334	2.55169	3.56865	4.39158	1	42	42	38	28	23	19	14	.	24	24	23	20	16	13	9	6425	72.0914	10.4433	5.8529	3.0837	8.768	2.34596	1.76693	1.12613	0.07107
C76-C80	11.7059	32.448	74.936	0.04136	4030.33	2005	3913	73.7708	11.1687	32.573	75.614	30275449	28036863	24488083	32242364	8.27206	2.41312	3.48349	4.32564	3	45	45	39	31	25	20	15	.	24	24	23	22	18	14	10	6500	71.7692	10.5759	5.9805	3.1833	8.7796	2.35858	1.7885	1.15793	0.04136
C76-C80	11.7059	32.448	74.936	0.04106	4030.33	2006	4020	74.0891	12.5849	33.304	75.312	30542403	28260547	24569090	32570505	8.29904	2.5325	3.50569	4.32164	.	45	45	39	33	25	21	16	.	24	24	23	22	18	15	11	6810	71.4794	10.7242	6.1304	3.2875	8.8261	2.3725	1.81325	1.19014	0.04106
C76-C80	11.7059	32.448	74.936	-0.05943	4030.33	2007	3970	74.4986	11.0886	31.266	71.035	30809293	28475290	24646922	32887928	8.28652	2.40592	3.44252	4.26318	1	46	46	40	36	27	21	17	.	24	24	23	22	20	15	12	6345	72.6103	10.6011	6.089	3.2586	8.7554	2.36095	1.80648	1.18129	0.05943
C76-C80	11.7059	32.448	74.936	-0.13476	4030.33	2008	3906	75.1371	9.5941	27.251	63.962	31119019	28713168	24749702	33245773	8.27027	2.26114	3.30507	4.1583	1	47	47	41	37	27	21	18	.	24	24	24	22	20	15	13	6415	72.5078	10.4192	6.0212	3.2397	8.7664	2.34365	1.79528	1.17547	0.13476
C76-C80	11.7059	32.448	74.936	-0.16202	4030.33	2009	3508	74.5936	9.5763	26.885	62.114	31459329	28967461	24858115	33628571	8.1628	2.2593	3.29158	4.12896	.	47	47	42	38	28	23	19	.	24	24	24	23	20	16	13	6350	72.5591	10.2236	5.9906	3.1639	8.7562	2.3247	1.79019	1.15182	0.16202
C76-C80	11.7059	32.448	74.936	-0.02072	4030.33	2010	4592	75.3936	10.0037	29.939	72.738	31788672	29209131	24940838	34005274	8.43207	2.30295	3.39917	4.28687	.	47	47	45	39	31	25	20	.	24	24	24	23	22	18	14	6660	71.8994	10.1215	5.9787	3.1357	8.8039	2.31467	1.78821	1.14287	0.02072
C76-C80	11.7059	32.448	74.936	-0.03377	4030.33	2011	4622	75.6842	9.4742	28.145	70.178	32079232	29392470	24988937	34342780	8.43858	2.24857	3.33737	4.25103	.	47	47	45	39	33	25	21	.	24	24	24	23	22	18	15	.	.	.	.	.	.	.	.	.	0.03377
C81-C96	39.9731	75.761	147.276	0.10487	6223.92	2000	5823	69.9064	51.8788	93.547	170.492	28989695	26842052	24031980	30685730	8.66957	3.94891	4.53847	5.13869	2	52	52	49	41	34	25	18	1	27	27	26	24	20	16	12	11755	62.2171	27.845	19.8664	14.198	9.372	3.32665	2.98903	2.6531	0.10487
C81-C96	39.9731	75.761	147.276	0.05871	6223.92	2001	5925	70.7877	46.6641	85.501	159.694	29270445	27108306	24189914	31020596	8.68694	3.84297	4.44853	5.07326	1	53	53	49	42	37	26	21	1	28	28	26	24	22	17	13	11875	62.7253	28.1197	19.9556	14.1923	9.3822	3.33647	2.99351	2.6527	0.05871
C81-C96	39.9731	75.761	147.276	0.01829	6223.92	2002	5958	71.1248	43.2025	80.962	153.87	29553108	27378337	24289082	31358418	8.69249	3.7659	4.39398	5.03611	1	54	54	50	45	37	27	22	.	28	28	26	25	22	18	14	12300	62.7703	28.322	20.1038	14.2431	9.4174	3.34364	3.00091	2.65627	0.01829
C81-C96	39.9731	75.761	147.276	0.05012	6223.92	2003	6243	71.3747	44.2404	82.695	156.287	29780450	27589965	24339745	31641630	8.73922	3.78964	4.41516	5.05169	.	54	54	50	47	37	29	22	.	28	28	26	25	22	19	14	12660	62.9265	28.6017	20.4262	14.3524	9.4462	3.35347	3.01682	2.66392	0.05012
C81-C96	39.9731	75.761	147.276	0.06681	6223.92	2004	6287	71.2404	43.6052	82.861	158.267	30026229	27810425	24409913	31938004	8.74624	3.77518	4.41716	5.06428	1	55	55	50	47	39	32	24	.	28	28	26	25	22	19	15	13265	63.2463	28.9862	20.6913	14.4222	9.4929	3.36682	3.02971	2.66877	0.06681
C81-C96	39.9731	75.761	147.276	0.02668	6223.92	2005	6166	71.8045	40.0644	75.583	146.632	30275449	28036863	24488083	32242364	8.72681	3.69049	4.32523	4.98793	.	55	55	52	49	41	34	25	.	28	28	27	26	24	20	16	13495	63.4281	29.3545	20.9708	14.459	9.5101	3.37945	3.04313	2.67132	0.02668
C81-C96	39.9731	75.761	147.276	-0.01392	6223.92	2006	6122	72.0881	36.78	70.979	140.277	30542403	28260547	24569090	32570505	8.71964	3.60495	4.26238	4.94362	.	55	55	53	49	42	37	26	.	28	28	28	26	24	22	17	13835	63.5643	29.9091	21.4457	14.6399	9.535	3.39816	3.06552	2.68375	0.01392
C81-C96	39.9731	75.761	147.276	-0.05565	6223.92	2007	6375	72.3438	35.1099	69.327	140.318	30809293	28475290	24646922	32887928	8.76014	3.55848	4.23883	4.94391	3	58	58	54	50	45	37	27	.	28	28	28	26	25	22	18	14420	63.9147	30.4853	21.8778	14.6625	9.5764	3.41724	3.08547	2.68529	0.05565
C81-C96	39.9731	75.761	147.276	-0.00654	6223.92	2008	6278	72.0662	37.257	72.113	143.091	31119019	28713168	24749702	33245773	8.74481	3.61784	4.27824	4.96348	2	60	60	54	50	47	37	29	.	28	28	28	26	25	22	19	14255	63.7013	30.9056	22.1166	14.7195	9.5649	3.43094	3.09633	2.68917	0.00654
C81-C96	39.9731	75.761	147.276	-0.03492	6223.92	2009	6558	72.7097	35.6322	68.637	138.798	31459329	28967461	24858115	33628571	8.78844	3.57325	4.22884	4.93302	2	62	62	55	50	47	39	32	.	28	28	28	26	25	22	19	14850	64.2475	31.2477	22.3443	14.6699	9.6058	3.44194	3.10657	2.6858	0.03492
C81-C96	39.9731	75.761	147.276	-0.11762	6223.92	2010	6331	73.0126	34.1709	64.654	129.92	31788672	29209131	24940838	34005274	8.75321	3.53137	4.16906	4.86692	1	63	63	55	52	49	41	34	.	28	28	28	27	26	24	20	15150	64.2805	31.6092	22.5463	14.7097	9.6258	3.45345	3.11557	2.68851	0.11762
C81-C96	39.9731	75.761	147.276	-0.09683	6223.92	2011	6621	73.3153	31.0717	62.268	129.662	32079232	29392470	24988937	34342780	8.798	3.4363	4.13144	4.86493	1	64	64	55	53	49	42	37	1	29	29	28	28	26	24	22	.	.	.	.	.	.	.	.	.	0.09683
C97	2.0137	6.014	15.514	0.01363	1005.1	2000	981	74.5133	2.3614	6.631	16.377	28989695	26842052	24031980	30685730	6.88857	0.85927	1.89181	2.79585	1	6	6	5	5	3	3	1	1	6	6	5	5	3	3	1	.	.	.	.	.	.	.	.	.	0.01363
C97	2.0137	6.014	15.514	-0.01539	1005.1	2001	982	74.8396	1.9946	5.782	15.604	29270445	27108306	24189914	31020596	6.88959	0.69046	1.75481	2.74756	.	6	6	5	5	3	3	1	.	6	6	5	5	3	3	1	.	.	.	.	.	.	.	.	.	0.01539
C97	2.0137	6.014	15.514	-0.05209	1005.1	2002	959	75.1694	2.0277	5.926	15.091	29553108	27378337	24289082	31358418	6.86589	0.70688	1.77939	2.71413	1	7	7	5	5	3	3	1	.	6	6	5	5	3	3	1	.	.	.	.	.	.	.	.	.	0.05209
C97	2.0137	6.014	15.514	0.09304	1005.1	2003	1042	74.8249	2.4035	6.733	17.167	29780450	27589965	24339745	31641630	6.9489	0.87692	1.90695	2.84301	.	7	7	5	5	3	3	1	.	6	6	5	5	3	3	1	.	.	.	.	.	.	.	.	.	0.09304
C97	2.0137	6.014	15.514	0.00587	1005.1	2004	957	74.7231	1.7001	5.861	15.67	30026229	27810425	24409913	31938004	6.8638	0.5307	1.76834	2.75172	.	7	7	5	5	3	3	2	.	6	6	5	5	3	3	2	.	.	.	.	.	.	.	.	.	0.00587
C97	2.0137	6.014	15.514	0.02045	1005.1	2005	1072	75.7299	1.7355	5.912	15.334	30275449	28036863	24488083	32242364	6.97728	0.55132	1.77696	2.73009	.	7	7	6	5	5	3	3	.	6	6	6	5	5	3	3	.	.	.	.	.	.	.	.	.	0.02045
C97	2.0137	6.014	15.514	-0.02473	1005.1	2006	995	75.5955	1.8316	5.617	14.603	30542403	28260547	24569090	32570505	6.90274	0.60517	1.72586	2.6812	.	7	7	6	5	5	3	3	.	6	6	6	5	5	3	3	.	.	.	.	.	.	.	.	.	0.02473
C97	2.0137	6.014	15.514	-0.02198	1005.1	2007	961	74.8751	2.2822	6.067	15.271	30809293	28475290	24646922	32887928	6.86797	0.82515	1.80281	2.72598	.	7	7	7	5	5	3	3	.	6	6	6	5	5	3	3	.	.	.	.	.	.	.	.	.	0.02198
C97	2.0137	6.014	15.514	-0.04921	1005.1	2008	1025	75.9439	1.9293	5.616	14.428	31119019	28713168	24749702	33245773	6.93245	0.65717	1.7256	2.6692	.	7	7	7	5	5	3	3	.	6	6	6	5	5	3	3	.	.	.	.	.	.	.	.	.	0.04921
C97	2.0137	6.014	15.514	0.03039	1005.1	2009	1077	75.8589	1.8706	5.998	15.592	31459329	28967461	24858115	33628571	6.98193	0.62627	1.79144	2.74673	.	7	7	7	5	5	3	3	.	6	6	6	5	5	3	3	.	.	.	.	.	.	.	.	.	0.03039

## Sheet: q8
group	cum_0	cum_5	cum_10	cum_15	cum_20	cum_25
Year	2013	2008	2003	1998	1993	1988
C00-C14 lip, oral cavity and pharynx	13	13	13	11	10	8
C15-C26 digestive organs	31	31	24	21	15	12
C30-C39 respiratory system and intrathoracic organs	35	35	32	29	23	19
C40-C41 bone and articular cartilage	13	13	13	11	11	8
C43-C44 skin	18	16	16	12	12	9
C45-C49 connective and soft tissue	26	25	23	21	21	15
C50-C50 breast	41	38	37	32	22	16
C51-C58 female genital organs	31	29	28	26	22	17
C60-C63 male genital organs	29	27	27	24	21	15
C64-C68 urinary organs	23	22	21	19	18	13
C69-C72 eye, brain and central nervous system	18	18	18	15	15	13
C73-C75 endocrine glands and related structures	13	13	12	10	10	8
C76-C80 secondary and ill-defined	47	47	41	37	27	21
C81-C96 stated or presumed to be primary, of lymphoid, haematopoietic and related tissue	67	60	54	50	47	37
C97 independent (primary) multiple sites	7	7	7	5	5	3
Year	C00-C14 lip, oral cavity and pharynx	C15-C26 digestive organs	C30-C39 respiratory system and intrathoracic organs	C40-C41 bone and articular cartilage	C43-C44 skin	C45-C49 connective and soft tissue	C50-C50 breast	C51-C58 female genital organs	C60-C63 male genital organs	C64-C68 urinary organs	C69-C72 eye, brain and central nervous system	C73-C75 endocrine glands and related structures	C76-C80 secondary and ill-defined	C81-C96 stated or presumed to be primary, of lymphoid, haematopoietic and related tissue	C97 independent (primary) multiple sites
1988	8	12	19	8	9	15	16	17	15	13	13	8	21	37	3
1993	10	15	23	11	12	21	22	22	21	18	15	10	27	47	5
1998	11	21	29	11	12	21	32	26	24	19	15	10	37	50	5
2003	13	24	32	13	16	23	37	28	27	21	18	12	41	54	7
2008	13	31	35	13	16	25	38	29	27	22	18	13	47	60	7
2013	13	31	35	13	18	26	41	31	29	23	18	13	47	67	7
Year	1988	1993	1998	2003	2008	2013
C97 independent (primary) multiple sites	3	5	5	7	7	7
C00-C14 lip, oral cavity and pharynx	8	10	11	13	13	13
C40-C41 bone and articular cartilage	8	11	11	13	13	13
C73-C75 endocrine glands and related structures	8	10	10	12	13	13
C43-C44 skin	9	12	12	16	16	18
Year	1988	1993	1998	2003	2008	2013
C15-C26 digestive organs	12	15	21	24	31	31	19
C64-C68 urinary organs	13	18	19	21	22	23	10
C69-C72 eye, brain and central nervous system	13	15	15	18	18	18	5
C45-C49 connective and soft tissue	15	21	21	23	25	26	11
C60-C63 male genital organs	15	21	24	27	27	29	14
C50-C50 breast	16	22	32	37	38	41	25
C51-C58 female genital organs	17	22	26	28	29	31	14
C30-C39 respiratory system and intrathoracic organs	19	23	29	32	35	35	16
C76-C80 secondary and ill-defined	21	27	37	41	47	47	26
C81-C96 stated or presumed to be primary, of lymphoid, haematopoietic and related tissue	37	47	50	54	60	67	30

## Sheet: who10 (2)
group	Year	lyl75	cum_15	seq	dcum_15	dllyl75	lyl75_mean	dcum_15	dllyl75
C00-C14 lip, oral cavity and pharynx	2011	31.195	11	2	4	0.05638	31.424	22.4228	0.31605
C15-C26 digestive organs	2011	374.646	19	2	7	0.03721	366.986	134.098	0.712827
C30-C39 respiratory system and intrathoracic organs	2011	385.343	28	2	10	-0.08689	408.713	202.167	-1.75662
C40-C41 bone and articular cartilage	2011	11.737	11	2	3	-0.1938	11.262	10.0677	-0.650372
C43-C44 skin	2011	33.378	12	2	4	0.00896	34.514	23.4994	0.0526388
C45-C49 connective and soft tissue	2011	26.352	21	2	6	-0.05707	29.215	32.4305	-0.308468
C50-C50 breast	2011	138.041	29	2	13	-0.20087	156.079	162.411	-2.5095
C51-C58 female genital organs	2011	88.913	25	2	9	0.08111	83.356	82.1696	0.74053
C60-C63 male genital organs	2011	27.152	24	2	11	-0.19856	29.902	60.151	-1.08578
C64-C68 urinary organs	2011	56.134	19	2	6	-0.02484	56.912	45.264	-0.187393
C69-C72 eye, brain and central nervous system	2011	84.452	15	2	2	-0.00847	82.826	18.2018	-0.0770844
C73-C75 endocrine glands and related structures	2011	11.115	10	2	2	0.02295	10.37	6.4405	0.0739047
C76-C80 secondary and ill-defined	2011	70.178	33	2	13	-0.1576	74.936	112.535	-1.36427
C81-C96 lymphoid, haematopoietic and related tissue	2011	129.662	49	2	15	-0.27376	147.276	182.036	-3.32228

## Sheet: who10
group	lyl75_mean	Year	lyl75	cum_15	seq	dllyl75	dcum_15
C00-C14 lip, oral cavity and pharynx	31.424	2000	29.485	7	1	.	.
C00-C14 lip, oral cavity and pharynx	31.424	2011	31.195	11	2	0.05638	4
C15-C26 digestive organs	366.986	2000	360.963	12	1	2.44853	1
C15-C26 digestive organs	366.986	2011	374.646	19	2	0.03721	7
C30-C39 respiratory system and intrathoracic organs	408.713	2000	420.322	18	1	0.11504	-1
C30-C39 respiratory system and intrathoracic organs	408.713	2011	385.343	28	2	-0.08689	10
C40-C41 bone and articular cartilage	11.262	2000	14.246	8	1	-3.29763	-20
C40-C41 bone and articular cartilage	11.262	2011	11.737	11	2	-0.1938	3
C43-C44 skin	34.514	2000	33.081	8	1	1.03624	-3
C43-C44 skin	34.514	2011	33.378	12	2	0.00896	4
C45-C49 connective and soft tissue	29.215	2000	27.9	15	1	-0.17929	3
C45-C49 connective and soft tissue	29.215	2011	26.352	21	2	-0.05707	6
C50-C50 breast	156.079	2000	168.75	16	1	1.85687	-5
C50-C50 breast	156.079	2011	138.041	29	2	-0.20087	13
C51-C58 female genital organs	83.356	2000	81.986	16	1	-0.521	-13
C51-C58 female genital organs	83.356	2011	88.913	25	2	0.08111	9
C60-C63 male genital organs	29.902	2000	33.115	13	1	-0.98766	-12
C60-C63 male genital organs	29.902	2011	27.152	24	2	-0.19856	11
C64-C68 urinary organs	56.912	2000	57.546	13	1	0.75116	-11
C64-C68 urinary organs	56.912	2011	56.134	19	2	-0.02484	6
C69-C72 eye, brain and central nervous system	82.826	2000	85.17	13	1	0.4169	-6
C69-C72 eye, brain and central nervous system	82.826	2011	84.452	15	2	-0.00847	2
C73-C75 endocrine glands and related structures	10.37	2000	10.862	8	1	-2.05087	-7
C73-C75 endocrine glands and related structures	10.37	2011	11.115	10	2	0.02295	2
C76-C80 secondary and ill-defined	74.936	2000	82.157	20	1	2.00036	10
C76-C80 secondary and ill-defined	74.936	2011	70.178	33	2	-0.1576	13
C81-C96 stated or presumed to be primary, of lymphoid, haematopoietic and related tissue	147.276	2000	170.492	34	1	0.88765	1
C81-C96 stated or presumed to be primary, of lymphoid, haematopoietic and related tissue	147.276	2011	129.662	49	2	-0.27376	15
C97 independent (primary) multiple sites	15.514	2000	16.377	3	1	-2.06908	-46

## Sheet: who9
group	2011/2000	lyl75_2000	lyl75_2011			group	2011/2000
C51-C58 female genital organs	0.182374	23767.5	28522.5			C51-C58 female genital organs	0.0811057	81.986	88.9127
C00-C14 lip, oral cavity and pharynx	0.157646	8547.5	10007			C00-C14 lip, oral cavity and pharynx	0.0563776	29.4846	31.1946
C15-C26 digestive organs	0.138475	104642	120184			C15-C26 digestive organs	0.0372063	360.963	374.646
C73-C75 endocrine glands and related structures	0.124219	3149	3565.5			C73-C75 endocrine glands and related structures	0.0229509	10.8625	11.1147
C43-C44 skin	0.110224	9590	10707.5			C43-C44 skin	0.00895512	33.0807	33.3783
C69-C72 eye, brain and central nervous system	0.0928015	24690.5	27091.5			C69-C72 eye, brain and central nervous system	-0.00846695	85.1699	84.4518
C64-C68 urinary organs	0.0764281	16682.5	18007.5			C64-C68 urinary organs	-0.0248403	57.5463	56.1344
C45-C49 connective and soft tissue	0.0441991	8088	8453.5			C45-C49 connective and soft tissue	-0.0570693	27.8996	26.3519
C30-C39 respiratory system and intrathoracic organs	0.0143811	121850	123615			C30-C39 respiratory system and intrathoracic organs	-0.0868873	420.322	385.343
C76-C80 secondary and ill-defined	-0.0563289	23817	22512.5			C76-C80 secondary and ill-defined	-0.157597	82.1568	70.1778
C40-C41 bone and articular cartilage	-0.0925295	4130	3765			C40-C41 bone and articular cartilage	-0.193798	14.2464	11.7366
C60-C63 male genital organs	-0.0972913	9600	8710			C60-C63 male genital organs	-0.19856	33.1152	27.1515
C50-C50 breast	-0.0995967	48920	44282.5			C50-C50 breast	-0.200865	168.75	138.041
C81-C96 stated or presumed to be primary, of lymphoid, haematopoietic and related tissue	-0.172488	49425	41594.5			C81-C96 lymphoid, haematopoietic and related tissue	-0.273757	170.492	129.662
		456899	471018				-0.0708345	1576.07	1468.3	0.931616
		28989695	32079232
								1994-1998	1999-2003	2004-2008
								1646	1607.3	1539.5	0.935298

## Sheet: population by age
Table 051-0001 Estimates of population, by age group and sex for July 1, Canada, provinces and territories, annual (persons unless otherwise noted)(1,2,6,7)
Survey or program details:
Estimates of Population by Age and Sex for Canada, Provinces and Territories - 3604
Geography	Sex	Age group (5,6)	2000	2001	2002	2003	2004	2005	2006	2007	2008	2009	2010	2011
Canada	Both sexes	All ages	30685730	31020596	31358418	31641630	31938004	32242364	32570505	32887928	33245773	33628571	34005274	34342780
Canada	Both sexes	0 to 4 years	1790991	1758181	1726408	1707645	1706672	1709407	1733366	1758225	1797107	1834121	1873393	1899064
Canada	Both sexes	5 to 9 years	2037543	2017232	1988899	1947846	1905262	1864996	1824705	1802136	1790753	1792151	1791353	1810433
Canada	Both sexes	10 to 14 years	2056432	2079991	2115023	2139471	2142206	2124999	2096308	2066214	2032702	1997284	1959726	1918164
Canada	Both sexes	15 to 19 years	2096495	2116391	2128642	2130282	2144581	2176718	2211744	2232336	2251270	2256244	2249523	2238952
Canada	Both sexes	20 to 24 years	2068964	2109495	2142598	2178269	2211246	2234806	2251917	2261457	2264772	2286287	2322472	2354354
Canada	Both sexes	25 to 29 years	2074802	2073544	2085921	2098855	2125149	2151464	2184809	2224820	2273068	2322336	2357952	2369841
Canada	Both sexes	30 to 34 years	2254086	2240861	2231800	2215291	2194968	2182519	2171386	2182324	2207602	2245753	2283852	2327955
Canada	Both sexes	35 to 39 years	2689563	2639731	2578843	2490696	2407665	2346828	2322938	2307387	2300259	2288548	2282931	2273087
Canada	Both sexes	40 to 44 years	2601704	2656551	2692263	2726311	2755292	2760892	2715827	2641540	2549066	2466073	2403740	2385918
Canada	Both sexes	45 to 49 years	2316119	2379995	2456740	2524858	2575417	2621104	2672832	2711983	2755222	2785300	2780899	2719909
Canada	Both sexes	50 to 54 years	2045281	2117942	2141945	2180221	2241455	2314350	2383258	2458500	2527881	2584018	2634997	2691260
Canada	Both sexes	55 to 59 years	1556463	1629192	1750370	1848561	1933405	2016904	2088188	2112118	2153017	2214580	2286601	2353090
Canada	Both sexes	60 to 64 years	1253609	1289200	1338885	1401659	1467107	1531876	1603269	1716250	1810449	1894766	1981692	2050443
Canada	Both sexes	65 to 69 years	1142328	1142304	1141265	1149631	1171974	1194578	1235261	1284809	1344248	1404852	1464642	1532940
Canada	Both sexes	70 to 74 years	1005315	1019835	1033506	1040854	1043830	1044008	1046595	1049194	1061603	1087016	1114899	1153822
Canada	Both sexes	75 to 79 years	805006	818945	829021	842442	851296	863600	877376	891561	901822	907837	913373	919338
Canada	Both sexes	80 to 84 years	495718	523143	554286	583346	610873	628660	643368	650778	661876	671051	685040	701140
Canada	Both sexes	85 to 89 years	269951	278471	284562	290755	299391	319417	344815	366287	385526	404471	417631	426739
Canada	Both sexes	90 to 94 years	..	100728	107428	113346	117833	121381	125818	131948	137981	145130	158295	171916
Canada	Both sexes	95 to 99 years	..	25382	26282	27375	28339	29534	32346	33447	34488	35279	36822	39147
Canada	Both sexes	100 years and over	..	3482	3731	3916	4043	4323	4379	4614	5061	5474	5441	5268
Canada	Both sexes	Median age (years)	36.8	37.2	37.6	38	38.3	38.6	38.9	39.2	39.4	39.6	39.8	40
Legend:
			2000	2001	2002	2003	2004	2005	2006	2007	2008	2009	2010	2011
		pop_lt75	28989695	29270445	29553108	29780450	30026229	30275449	30542403	30809293	31119019	31459329	31788672	32079232
		pop_lt65	26842052	27108306	27378337	27589965	27810425	28036863	28260547	28475290	28713168	28967461	29209131	29392470
		pop_lt55	24031980	24189914	24289082	24339745	24409913	24488083	24569090	24646922	24749702	24858115	24940838	24988937
..	Not available
Footnotes:
1	Postcensal estimates are based on the 2011 Census counts adjusted for census net undercoverage (CNU) (including adjustment for incompletely enumerated Indian reserves (IEIR)) and the components of demographic growth that occurred since that census. Intercensal estimates are produced using counts from two consecutive censuses adjusted for CNU (including (IEIR) and postcensal estimates.
2	Estimates are final intercensal up to 2010, final postcensal for 2011, updated postcensal for 2012 and 2013 and preliminary postcensal for 2014.
5	Age at last birthday in years.
6	Data for persons aged 90 to 100 years and over will be available from 2001.
7	The population growth, which is used to calculate population estimates, is comprised of the natural growth (CANSIM 51-0002 and 51-0013), international migration (CANSIM 51-0011) and interprovincial migration (CANSIM 51-0012).
Source:
Statistics Canada. Table 051-0001 - Estimates of population, by age group and sex for July 1, Canada, provinces and territories, annual (persons unless otherwise noted)
(accessed: January 26, 2015)

## Sheet: cansim-1030404-eng-690657533011
Table 103-0404 Cancer incidence, by selected sites of cancer and sex, three-year average, Canada, provinces, territories and health regions (2011 boundaries), occasional (age-standardized rate per 100,000 population)(1,2,3)
Survey or program details:
Canadian Cancer Registry - 3207
Geography (4,5)	Sex	Selected sites of cancer (ICD-O-3)	Characteristics (16,17,18,19,20)	1995/1997	1996/1998	1997/1999	1998/2000	1999/2001	2000/2002	2001/2003	2002/2004	2003/2005	2004/2006	2005/2007
Canada [0]	Both sexes	All invasive primary cancer sites (including in situ bladder) (13)	Cancer incidence	579.5	391.4	396	400.5	404.3	404.8	402.3	400.6	401.2	403.6	404.9
Canada [0]	Both sexes	Colon, rectum and rectosigmoid junction cancer [C18.0-C18.9 C19.9 C20.9 C26.0]	Cancer incidence	72.8	49.5	50.2	51.4	51.7	51.8	50.9	50.6	50.4	50.2	49.9
Canada [0]	Both sexes	Bronchus and lung cancer [C34.0-C34.9]	Cancer incidence	87.5	58.9	58.8	59.1	58.9	58.5	57.9	57.5	57.4	57.3	56.9
Canada [0]	Males	All invasive primary cancer sites (including in situ bladder) (13)	Cancer incidence	685.5	460	464.7	469.9	477	475.1	470.3	465.2	464.7	465.5	464.6
Canada [0]	Males	Colon, rectum and rectosigmoid junction cancer [C18.0-C18.9 C19.9 C20.9 C26.0]	Cancer incidence	88.5	59.9	60.9	62.6	63.2	63.3	62	61.5	61.1	61.1	60.8
Canada [0]	Males	Bronchus and lung cancer [C34.0-C34.9]	Cancer incidence	121.7	80.7	79.8	79	77.9	76.2	74.6	73	71.9	70.8	69.3
Canada [0]	Males	Prostate cancer [C61.9] (15)	Cancer incidence	166.9	113.6	116.7	119.9	126	127.3	125.7	122.2	121.7	123.6	124.3
Canada [0]	Females	All invasive primary cancer sites (including in situ bladder) (13)	Cancer incidence	508.3	345.5	349.8	353.3	353.4	355.3	354.2	354.7	355.5	358.7	361.3
Canada [0]	Females	Colon, rectum and rectosigmoid junction cancer [C18.0-C18.9 C19.9 C20.9 C26.0]	Cancer incidence	60.3	41.1	41.7	42.5	42.4	42.4	41.9	41.6	41.4	41.1	40.8
Canada [0]	Females	Bronchus and lung cancer [C34.0-C34.9]	Cancer incidence	61.8	42.5	43	44.1	44.6	45.3	45.5	45.9	46.5	47.3	47.6
Canada [0]	Females	Female breast cancer [C50.0-C50.9] (14)	Cancer incidence	148.5	101.5	103.7	103.5	102.5	101.5	99.8	98.8	97.5	98	98.4
Prince Edward Island [11]	Both sexes	All invasive primary cancer sites (including in situ bladder) (13)	Cancer incidence	613.4	422.5	429.7	426.5	423.3	427.2	448.6	451.1	452.2	437.3	445.3
Prince Edward Island [11]	Both sexes	Colon, rectum and rectosigmoid junction cancer [C18.0-C18.9 C19.9 C20.9 C26.0]	Cancer incidence	86.7	61.6	62.1	59.9	55	57.2	58.3	61.1	59.9	58.2	54.7
Prince Edward Island [11]	Both sexes	Bronchus and lung cancer [C34.0-C34.9]	Cancer incidence	99.8	68.9	69.3	71.2	68	62.1	60.2	61.1	64.7	64	62.5
Prince Edward Island [11]	Males	All invasive primary cancer sites (including in situ bladder) (13)	Cancer incidence	741.5	490.5	510.1	505	512.5	514.2	541.8	551.7	547.6	540.1	546.9
Prince Edward Island [11]	Males	Colon, rectum and rectosigmoid junction cancer [C18.0-C18.9 C19.9 C20.9 C26.0]	Cancer incidence	96.4	67.2	73.4	72.3	64.7	63.2	64.3	70.3	68.3	63.3	63.8
Prince Edward Island [11]	Males	Bronchus and lung cancer [C34.0-C34.9]	Cancer incidence	125.7	92.4	90.3	91.3	86.8	83.1	80.9	79.4	81.3	76.5	73.6
Prince Edward Island [11]	Males	Prostate cancer [C61.9] (15)	Cancer incidence	215.3	137.2	141.4	126.2	148.5	167	187.5	177.1	160.8	156.7	165.8
Prince Edward Island [11]	Females	All invasive primary cancer sites (including in situ bladder) (13)	Cancer incidence	524.4	377.9	375.2	370.6	354	358.4	377.8	374.1	376.1	352.8	361.3
Prince Edward Island [11]	Females	Colon, rectum and rectosigmoid junction cancer [C18.0-C18.9 C19.9 C20.9 C26.0]	Cancer incidence	79.8	57.9	53.2	50.6	48.1	53.5	54.2	53.2	52.2	53.5	47.4
Prince Edward Island [11]	Females	Bronchus and lung cancer [C34.0-C34.9]	Cancer incidence	81.5	51.6	54.7	56.4	52.8	45.4	44.9	49.4	52.8	55.4	54.1
Prince Edward Island [11]	Females	Female breast cancer [C50.0-C50.9] (14)	Cancer incidence	145.9	113.6	117	115.5	98.9	94.7	102.6	108.4	105.3	91.2	83.9
Nova Scotia by Zone [12]	Both sexes	All invasive primary cancer sites (including in situ bladder) (13)	Cancer incidence	615.2	424	436.7	447.1	448.3	446.4	442.1	439.7	440	453	456.3
Nova Scotia by Zone [12]	Both sexes	Colon, rectum and rectosigmoid junction cancer [C18.0-C18.9 C19.9 C20.9 C26.0]	Cancer incidence	82.7	58.2	58	60.1	59.4	61.6	61.7	61.2	60.3	60.4	60.7
Nova Scotia by Zone [12]	Both sexes	Bronchus and lung cancer [C34.0-C34.9]	Cancer incidence	98.2	66.2	70.5	71.3	71.1	68.8	68.5	67.1	67.4	68	68.8
Nova Scotia by Zone [12]	Males	All invasive primary cancer sites (including in situ bladder) (13)	Cancer incidence	735.1	504.3	524	539.3	544.8	536.4	531	528.2	528.3	540.8	539.3
Nova Scotia by Zone [12]	Males	Colon, rectum and rectosigmoid junction cancer [C18.0-C18.9 C19.9 C20.9 C26.0]	Cancer incidence	99.7	68.5	68.8	73.4	73.2	75.9	76.4	76	74.2	72	72.7
Nova Scotia by Zone [12]	Males	Bronchus and lung cancer [C34.0-C34.9]	Cancer incidence	135.1	89.3	95.6	96.6	93.1	90	89.9	89.2	87.4	86.6	85
Nova Scotia by Zone [12]	Males	Prostate cancer [C61.9] (15)	Cancer incidence	175.6	124.7	133.9	136.5	143.9	137.7	136	131.3	134.4	144.2	148.3
Nova Scotia by Zone [12]	Females	All invasive primary cancer sites (including in situ bladder) (13)	Cancer incidence	535.8	370.8	377.8	382.9	379.6	381.5	376.5	373	372.3	385.5	391.9
Nova Scotia by Zone [12]	Females	Colon, rectum and rectosigmoid junction cancer [C18.0-C18.9 C19.9 C20.9 C26.0]	Cancer incidence	69.9	51	50.3	50.4	48.8	50.3	49.9	49.2	49	50.9	51
Nova Scotia by Zone [12]	Females	Bronchus and lung cancer [C34.0-C34.9]	Cancer incidence	71.2	49	51.7	51.7	54.3	53.1	52.5	50.3	52.1	54	56.9
Nova Scotia by Zone [12]	Females	Female breast cancer [C50.0-C50.9] (14)	Cancer incidence	154	105.4	106.8	107.2	103.2	104.5	99.8	98.4	96.6	102.1	101.9
New Brunswick [13]	Both sexes	All invasive primary cancer sites (including in situ bladder) (13)	Cancer incidence	608.6	417.6	426.5	422.3	420.3	412.5	413.9	410.1	420.1	431.5	442.6
New Brunswick [13]	Both sexes	Colon, rectum and rectosigmoid junction cancer [C18.0-C18.9 C19.9 C20.9 C26.0]	Cancer incidence	77	52.6	53.5	52.3	51.6	51.2	51.7	49.7	49.7	49.2	50.5
New Brunswick [13]	Both sexes	Bronchus and lung cancer [C34.0-C34.9]	Cancer incidence	96.9	67	68.3	69.8	69.1	68.3	68.3	68	68.2	69.4	69.6
New Brunswick [13]	Males	All invasive primary cancer sites (including in situ bladder) (13)	Cancer incidence	750.7	510.6	520.3	512.6	511.7	495.3	497.3	492.1	508.3	521.4	532.9
New Brunswick [13]	Males	Colon, rectum and rectosigmoid junction cancer [C18.0-C18.9 C19.9 C20.9 C26.0]	Cancer incidence	90.1	61.4	61.7	62.5	61.8	61.4	61.2	59	60.7	61.9	64.2
New Brunswick [13]	Males	Bronchus and lung cancer [C34.0-C34.9]	Cancer incidence	143.7	96.9	98.1	99.2	97.7	94.5	94.4	92.6	90.4	87.2	87.9
New Brunswick [13]	Males	Prostate cancer [C61.9] (15)	Cancer incidence	199.7	142.5	145.5	139.3	135.2	131.1	130	129.6	136.9	149.6	158.6
New Brunswick [13]	Females	All invasive primary cancer sites (including in situ bladder) (13)	Cancer incidence	504.8	350.8	359.5	358.3	355.1	353.1	353.6	350.4	355	363.4	371.7
New Brunswick [13]	Females	Colon, rectum and rectosigmoid junction cancer [C18.0-C18.9 C19.9 C20.9 C26.0]	Cancer incidence	66.2	45.6	47.1	44.5	43.8	43.1	43.8	41.7	40.7	38.8	39.3
New Brunswick [13]	Females	Bronchus and lung cancer [C34.0-C34.9]	Cancer incidence	60.8	44	45.7	47.6	47.6	48.5	48.7	49.7	51.9	56.5	56
New Brunswick [13]	Females	Female breast cancer [C50.0-C50.9] (14)	Cancer incidence	148.6	100.9	102.1	101.5	99.1	97.2	97.5	93.8	94.7	92.8	96.3
Quebec [24] (6)	Both sexes	All invasive primary cancer sites (including in situ bladder) (13)	Cancer incidence	587.2	392.5	396.3	408.3	415.5	419.7	417.6	416.8	418.4	417.5	413.4
Quebec [24] (6)	Both sexes	Colon, rectum and rectosigmoid junction cancer [C18.0-C18.9 C19.9 C20.9 C26.0]	Cancer incidence	75.4	50.8	51.5	53.8	54.8	55.8	55	54.8	54.1	53.3	52.4
Quebec [24] (6)	Both sexes	Bronchus and lung cancer [C34.0-C34.9]	Cancer incidence	103.5	69.8	70.1	71.3	72.5	73.6	73.4	73.1	72.5	71.8	70.1
Quebec [24] (6)	Males	All invasive primary cancer sites (including in situ bladder) (13)	Cancer incidence	714.8	470.9	471.8	485.7	497.7	502.9	499.2	496.1	494.6	489	477.6
Quebec [24] (6)	Males	Colon, rectum and rectosigmoid junction cancer [C18.0-C18.9 C19.9 C20.9 C26.0]	Cancer incidence	93.2	62.5	63.5	67.2	69.2	70.6	68.9	68	66.5	65.7	64.9
Quebec [24] (6)	Males	Bronchus and lung cancer [C34.0-C34.9]	Cancer incidence	158.7	105.9	105	105.5	106	106	103.6	100.8	98.5	96.1	91.9
Quebec [24] (6)	Males	Prostate cancer [C61.9] (15)	Cancer incidence	131.8	84.1	84.9	89.1	94.5	97.5	100	101.2	102.5	100.3	96.5
Quebec [24] (6)	Females	All invasive primary cancer sites (including in situ bladder) (13)	Cancer incidence	508.1	345.2	351	362.2	365.3	368.6	366.4	366.2	369.5	371.2	371.7
Quebec [24] (6)	Females	Colon, rectum and rectosigmoid junction cancer [C18.0-C18.9 C19.9 C20.9 C26.0]	Cancer incidence	62.2	42.1	42.7	44.1	44.2	44.6	44.3	44.4	44.3	43.4	42.4
Quebec [24] (6)	Females	Bronchus and lung cancer [C34.0-C34.9]	Cancer incidence	64.4	44.4	45.4	47.4	49.2	51.3	52.6	53.8	54.2	54.6	54.6
Quebec [24] (6)	Females	Female breast cancer [C50.0-C50.9] (14)	Cancer incidence	146.5	101.8	105.1	108.2	107.7	106.4	103.2	101.3	100.2	100.5	100.6
Ontario by Local Health Integration Network [35] (7,8)	Both sexes	All invasive primary cancer sites (including in situ bladder) (13)	Cancer incidence	551.4	373.6	379.3	382.2	385.5	386.2	385.3	386.3	392	395.5	398.8
Ontario by Local Health Integration Network [35] (7,8)	Both sexes	Colon, rectum and rectosigmoid junction cancer [C18.0-C18.9 C19.9 C20.9 C26.0]	Cancer incidence	70.5	47.9	48.8	49.7	50	49.5	48.4	47.8	47.9	48.1	47.8
Ontario by Local Health Integration Network [35] (7,8)	Both sexes	Bronchus and lung cancer [C34.0-C34.9]	Cancer incidence	77.7	52.2	52	52.1	51.6	50.6	49.4	48.7	49.4	49.5	49.2
Ontario by Local Health Integration Network [35] (7,8)	Males	All invasive primary cancer sites (including in situ bladder) (13)	Cancer incidence	644.5	435.8	440.7	443	449	447.8	444.1	441.8	448.7	452.1	454.7
Ontario by Local Health Integration Network [35] (7,8)	Males	Colon, rectum and rectosigmoid junction cancer [C18.0-C18.9 C19.9 C20.9 C26.0]	Cancer incidence	85.7	57.6	58.3	59.1	60.3	59.9	58.4	57.5	57.6	58.2	57.9
Ontario by Local Health Integration Network [35] (7,8)	Males	Bronchus and lung cancer [C34.0-C34.9]	Cancer incidence	105.5	69.6	68.2	67.1	65.9	63.9	61.9	60.3	60.4	59.8	58.8
Ontario by Local Health Integration Network [35] (7,8)	Males	Prostate cancer [C61.9] (15)	Cancer incidence	167.8	116.8	119.7	121.6	127.5	130.8	128.8	126.2	128.7	133.5	135.7
Ontario by Local Health Integration Network [35] (7,8)	Females	All invasive primary cancer sites (including in situ bladder) (13)	Cancer incidence	489.7	332.1	338.1	340.6	340.9	342.7	343.7	346.9	351.2	354.5	358
Ontario by Local Health Integration Network [35] (7,8)	Females	Colon, rectum and rectosigmoid junction cancer [C18.0-C18.9 C19.9 C20.9 C26.0]	Cancer incidence	58.4	40	41	42	41.6	40.9	40.1	39.7	39.8	39.5	39.2
Ontario by Local Health Integration Network [35] (7,8)	Females	Bronchus and lung cancer [C34.0-C34.9]	Cancer incidence	56.8	39.1	39.8	40.7	40.7	40.4	39.8	39.9	41.2	41.8	42.1
Ontario by Local Health Integration Network [35] (7,8)	Females	Female breast cancer [C50.0-C50.9] (14)	Cancer incidence	144.7	98.2	100.3	99.3	98.9	98.5	97.6	96.8	96.2	96.9	97.8
Ontario by Health Unit [35] (7,8)	Both sexes	All invasive primary cancer sites (including in situ bladder) (13)	Cancer incidence	551.4	373.6	379.3	382.2	385.5	386.2	385.3	386.3	392	395.5	398.8
Ontario by Health Unit [35] (7,8)	Both sexes	Colon, rectum and rectosigmoid junction cancer [C18.0-C18.9 C19.9 C20.9 C26.0]	Cancer incidence	70.5	47.9	48.8	49.7	50	49.5	48.4	47.8	47.9	48.1	47.8
Ontario by Health Unit [35] (7,8)	Both sexes	Bronchus and lung cancer [C34.0-C34.9]	Cancer incidence	77.7	52.2	52	52.1	51.6	50.6	49.4	48.7	49.4	49.5	49.2
Ontario by Health Unit [35] (7,8)	Males	All invasive primary cancer sites (including in situ bladder) (13)	Cancer incidence	644.5	435.8	440.7	443	449	447.8	444.1	441.8	448.7	452.1	454.7
Ontario by Health Unit [35] (7,8)	Males	Colon, rectum and rectosigmoid junction cancer [C18.0-C18.9 C19.9 C20.9 C26.0]	Cancer incidence	85.7	57.6	58.3	59.1	60.3	59.9	58.4	57.5	57.6	58.2	57.9
Ontario by Health Unit [35] (7,8)	Males	Bronchus and lung cancer [C34.0-C34.9]	Cancer incidence	105.5	69.6	68.2	67.1	65.9	63.9	61.9	60.3	60.4	59.8	58.8
Ontario by Health Unit [35] (7,8)	Males	Prostate cancer [C61.9] (15)	Cancer incidence	167.8	116.8	119.7	121.6	127.5	130.8	128.8	126.2	128.7	133.5	135.7
Ontario by Health Unit [35] (7,8)	Females	All invasive primary cancer sites (including in situ bladder) (13)	Cancer incidence	489.7	332.1	338.1	340.6	340.9	342.7	343.7	346.9	351.2	354.5	358
Ontario by Health Unit [35] (7,8)	Females	Colon, rectum and rectosigmoid junction cancer [C18.0-C18.9 C19.9 C20.9 C26.0]	Cancer incidence	58.4	40	41	42	41.6	40.9	40.1	39.7	39.8	39.5	39.2
Ontario by Health Unit [35] (7,8)	Females	Bronchus and lung cancer [C34.0-C34.9]	Cancer incidence	56.8	39.1	39.8	40.7	40.7	40.4	39.8	39.9	41.2	41.8	42.1
Ontario by Health Unit [35] (7,8)	Females	Female breast cancer [C50.0-C50.9] (14)	Cancer incidence	144.7	98.2	100.3	99.3	98.9	98.5	97.6	96.8	96.2	96.9	97.8
Manitoba [46] (9)	Both sexes	All invasive primary cancer sites (including in situ bladder) (13)	Cancer incidence	620.8	413.1	417.5	421.9	422.1	421.3	411.8	405.4	394.8	390.6	389.7
Manitoba [46] (9)	Both sexes	Colon, rectum and rectosigmoid junction cancer [C18.0-C18.9 C19.9 C20.9 C26.0]	Cancer incidence	77	53.5	54.8	55	53.7	54.5	53.3	53.1	50	49.9	50.6
Manitoba [46] (9)	Both sexes	Bronchus and lung cancer [C34.0-C34.9]	Cancer incidence	90.5	60	59.2	59.7	59.3	60.5	60.4	59.8	59	56.9	56
Manitoba [46] (9)	Males	All invasive primary cancer sites (including in situ bladder) (13)	Cancer incidence	724.7	485	489.4	497.7	490.5	487.1	472.9	466.1	450.3	441.5	440.8
Manitoba [46] (9)	Males	Colon, rectum and rectosigmoid junction cancer [C18.0-C18.9 C19.9 C20.9 C26.0]	Cancer incidence	92.8	65.8	67.1	68.4	65.9	66.8	65.4	64.7	61.5	60.9	61.7
Manitoba [46] (9)	Males	Bronchus and lung cancer [C34.0-C34.9]	Cancer incidence	117.9	78	76.7	77.6	74	72.4	69.5	69.5	69.2	67.2	66.8
Manitoba [46] (9)	Males	Prostate cancer [C61.9] (15)	Cancer incidence	191.1	124.4	125.3	124.9	126	127.5	124.8	118.3	107.8	104.5	103.1
Manitoba [46] (9)	Females	All invasive primary cancer sites (including in situ bladder) (13)	Cancer incidence	550.8	363.6	368.1	368.4	374.9	376.3	370.7	364.2	357	356.4	354.6
Manitoba [46] (9)	Females	Colon, rectum and rectosigmoid junction cancer [C18.0-C18.9 C19.9 C20.9 C26.0]	Cancer incidence	63.8	43.3	44.5	43.9	43.5	44.5	43.5	43.5	40.5	40.6	41.3
Manitoba [46] (9)	Females	Bronchus and lung cancer [C34.0-C34.9]	Cancer incidence	70.1	46.8	46.6	46.5	49	52.1	54.3	52.9	51.4	49.4	48
Manitoba [46] (9)	Females	Female breast cancer [C50.0-C50.9] (14)	Cancer incidence	159.6	104.2	105.4	105.5	105.2	103.1	102.5	101.1	98.1	97	96.9
Saskatchewan [47] (9)	Both sexes	All invasive primary cancer sites (including in situ bladder) (13)	Cancer incidence	557.2	378.1	386.6	392.9	400	401.8	403	403	401.4	397.7	396.8
Saskatchewan [47] (9)	Both sexes	Colon, rectum and rectosigmoid junction cancer [C18.0-C18.9 C19.9 C20.9 C26.0]	Cancer incidence	68.3	46.7	46.5	47.6	48.1	49.6	51	52	52.6	50.7	50.2
Saskatchewan [47] (9)	Both sexes	Bronchus and lung cancer [C34.0-C34.9]	Cancer incidence	73.8	50.8	52.1	52.8	53	52.4	52.2	51.9	52.5	53.4	54.1
Saskatchewan [47] (9)	Males	All invasive primary cancer sites (including in situ bladder) (13)	Cancer incidence	650.2	442.3	452.5	459.4	471.5	476.3	479.1	482.1	481.7	469.6	458.4
Saskatchewan [47] (9)	Males	Colon, rectum and rectosigmoid junction cancer [C18.0-C18.9 C19.9 C20.9 C26.0]	Cancer incidence	83.5	58.1	57.7	58.2	57.8	59.9	62.1	62.9	65	62.6	62.3
Saskatchewan [47] (9)	Males	Bronchus and lung cancer [C34.0-C34.9]	Cancer incidence	98.4	68	68.9	68.3	67.1	65.9	64.8	63.5	63.5	62.2	62.1
Saskatchewan [47] (9)	Males	Prostate cancer [C61.9] (15)	Cancer incidence	168.3	115.6	125.9	135	144.6	146.3	149.4	155.7	157.4	150	143.1
Saskatchewan [47] (9)	Females	All invasive primary cancer sites (including in situ bladder) (13)	Cancer incidence	489	331.2	339.2	344.9	347.7	345.8	345.3	341.3	338	341.2	348.5
Saskatchewan [47] (9)	Females	Colon, rectum and rectosigmoid junction cancer [C18.0-C18.9 C19.9 C20.9 C26.0]	Cancer incidence	55.3	36.8	37.1	38.5	40.1	40.7	41.3	42.4	41.7	40.6	39.6
Saskatchewan [47] (9)	Females	Bronchus and lung cancer [C34.0-C34.9]	Cancer incidence	54.5	37.2	38.6	40.8	42.2	42.5	43.1	43.5	44.4	47	48.5
Saskatchewan [47] (9)	Females	Female breast cancer [C50.0-C50.9] (14)	Cancer incidence	144.1	97	100.3	98	98.7	97.4	97.6	95.8	94.8	95.9	97.1
Alberta [48]	Both sexes	All invasive primary cancer sites (including in situ bladder) (13)	Cancer incidence	577.1	393	398.7	404.2	412.8	415.3	417	412.9	405.2	399.7	394.8
Alberta [48]	Both sexes	Colon, rectum and rectosigmoid junction cancer [C18.0-C18.9 C19.9 C20.9 C26.0]	Cancer incidence	66.3	44.9	45.2	46.7	47	47.4	46.8	46.9	47.1	46.6	46.1
Alberta [48]	Both sexes	Bronchus and lung cancer [C34.0-C34.9]	Cancer incidence	77	51.3	51.8	51.2	51.1	50.3	52.1	52.3	51.9	51.3	50.9
Alberta [48]	Males	All invasive primary cancer sites (including in situ bladder) (13)	Cancer incidence	674.2	454.6	461.7	470.9	486.6	487.4	490.3	478.9	468.9	458.9	451.2
Alberta [48]	Males	Colon, rectum and rectosigmoid junction cancer [C18.0-C18.9 C19.9 C20.9 C26.0]	Cancer incidence	83.7	56.1	57	58.3	58.4	58.6	58.1	58.1	57.5	57	55.7
Alberta [48]	Males	Bronchus and lung cancer [C34.0-C34.9]	Cancer incidence	102.5	66.9	66.6	63.7	62.8	60.5	63.3	62.6	61.1	59.5	58.8
Alberta [48]	Males	Prostate cancer [C61.9] (15)	Cancer incidence	187.5	128.8	132.3	140.2	156	159.9	162.6	149.3	140.6	133.4	128.1
Alberta [48]	Females	All invasive primary cancer sites (including in situ bladder) (13)	Cancer incidence	509.2	350.5	354.3	355.9	357.1	361.1	360.9	363	356.3	354.3	351.8
Alberta [48]	Females	Colon, rectum and rectosigmoid junction cancer [C18.0-C18.9 C19.9 C20.9 C26.0]	Cancer incidence	51.9	35.7	35.5	37	37.2	37.9	37.4	37.5	38.1	37.6	37.5
Alberta [48]	Females	Bronchus and lung cancer [C34.0-C34.9]	Cancer incidence	58.1	39.8	40.4	41.6	42	42.6	43.6	44.6	45	45.3	45.1
Alberta [48]	Females	Female breast cancer [C50.0-C50.9] (14)	Cancer incidence	150.2	103.8	107.3	105.5	105.5	104.9	103.5	103.9	98.7	97	95.6
British Columbia [59]	Both sexes	All invasive primary cancer sites (including in situ bladder) (13)	Cancer incidence	537.1	361.2	362.4	362.1	365.9	365.1	364.4	361.4	360.5	361	367.9
British Columbia [59]	Both sexes	Colon, rectum and rectosigmoid junction cancer [C18.0-C18.9 C19.9 C20.9 C26.0]	Cancer incidence	62.2	42.1	42.5	43.5	43.8	44	43.4	43.8	44.3	44.4	44.2
British Columbia [59]	Both sexes	Bronchus and lung cancer [C34.0-C34.9]	Cancer incidence	76.2	50.7	49.2	48.6	47.8	47.8	48.2	49.3	49.4	48.7	48.8
British Columbia [59]	Males	All invasive primary cancer sites (including in situ bladder) (13)	Cancer incidence	629.2	420.7	425.7	425.9	433.5	426.2	421.9	412.9	409.9	409.7	420.5
British Columbia [59]	Males	Colon, rectum and rectosigmoid junction cancer [C18.0-C18.9 C19.9 C20.9 C26.0]	Cancer incidence	74.1	50.7	52.3	53.3	53.2	52.4	51.5	52.2	53.1	53	53
British Columbia [59]	Males	Bronchus and lung cancer [C34.0-C34.9]	Cancer incidence	95.9	62.3	60.6	59.1	58.2	56.4	56.5	57	56.7	55.1	54.9
British Columbia [59]	Males	Prostate cancer [C61.9] (15)	Cancer incidence	174.8	118.3	123.7	127.1	131.8	127.9	120.7	113.5	108.9	112.2	119.9
British Columbia [59]	Females	All invasive primary cancer sites (including in situ bladder) (13)	Cancer incidence	469.6	318.1	315.7	314.5	313.8	317.6	319.4	321	321.6	322.4	325.5
British Columbia [59]	Females	Colon, rectum and rectosigmoid junction cancer [C18.0-C18.9 C19.9 C20.9 C26.0]	Cancer incidence	52.3	35	34.5	35.3	35.9	36.9	36.4	36.7	36.6	36.8	36.4
British Columbia [59]	Females	Bronchus and lung cancer [C34.0-C34.9]	Cancer incidence	60.9	41.9	40.4	40.6	39.7	41.2	42	43.7	43.9	43.9	44.2
British Columbia [59]	Females	Female breast cancer [C50.0-C50.9] (14)	Cancer incidence	140.2	96	96.8	94.3	92.3	90.9	90.8	90.8	91.5	92	92.9
Yukon [60]	Both sexes	All invasive primary cancer sites (including in situ bladder) (13)	Cancer incidence	454.3	273.5	295.2	306.2	353.1	388.8	391.7	411.2	392.9	377.4	355.5
Yukon [60]	Both sexes	Colon, rectum and rectosigmoid junction cancer [C18.0-C18.9 C19.9 C20.9 C26.0]	Cancer incidence	29.5	25	35.5	47.7	62.3	56	56.1	55.5	56.4	60.8	50.6
Yukon [60]	Both sexes	Bronchus and lung cancer [C34.0-C34.9]	Cancer incidence	87	51	43.7	53.5	56.4	67.4	62.7	67.9	60.8	54.5	49.6
Yukon [60]	Males	All invasive primary cancer sites (including in situ bladder) (13)	Cancer incidence	424.4	231.6	293.4	322.5	393.3	428.1	439.2	468.6	439.2	399.1	362.9
Yukon [60]	Males	Colon, rectum and rectosigmoid junction cancer [C18.0-C18.9 C19.9 C20.9 C26.0]	Cancer incidence	x	x	x	x	88	59.9	51	63.4	61	72.3	54.6
Yukon [60]	Males	Bronchus and lung cancer [C34.0-C34.9]	Cancer incidence	86.9	52.5	55.9	80.7	85.8	99.5	81.9	79.3	77.5	62.7	60.4
Yukon [60]	Males	Prostate cancer [C61.9] (15)	Cancer incidence	87.4	36.3	56.8	52	80.1	76.9	110.1	108.1	121.8	94.6	94.8
Yukon [60]	Females	All invasive primary cancer sites (including in situ bladder) (13)	Cancer incidence	483.9	318.7	296.8	293.3	308.4	351.3	343.5	353.8	344.2	350.2	341.9
Yukon [60]	Females	Colon, rectum and rectosigmoid junction cancer [C18.0-C18.9 C19.9 C20.9 C26.0]	Cancer incidence	x	x	x	x	37	50.5	58.1	43.6	47.6	44.9	42.2
Yukon [60]	Females	Bronchus and lung cancer [C34.0-C34.9]	Cancer incidence	87.5	52	37.9	27.8	25.3	29.1	39.9	53.8	41.3	45.1	38
Yukon [60]	Females	Female breast cancer [C50.0-C50.9] (14)	Cancer incidence	151.8	88.2	73.4	91	96.4	109.6	89.6	104.2	102.5	111.1	94.6
Northwest Territories [61] (12)	Both sexes	All invasive primary cancer sites (including in situ bladder) (13)	Cancer incidence	522.7	389.4	414.8	403.8	384.4	372.5	410.7	441	434.7	389	400
Northwest Territories [61] (12)	Both sexes	Colon, rectum and rectosigmoid junction cancer [C18.0-C18.9 C19.9 C20.9 C26.0]	Cancer incidence	122.7	82.3	92.1	100.7	90.7	91.9	95.5	109.9	83.2	68.5	72
Northwest Territories [61] (12)	Both sexes	Bronchus and lung cancer [C34.0-C34.9]	Cancer incidence	101.9	79.3	79	77.1	66.8	58.7	53.5	69.9	72.7	75.1	72.1
Northwest Territories [61] (12)	Males	All invasive primary cancer sites (including in situ bladder) (13)	Cancer incidence	515.7	429.4	451.6	425.2	376.8	368.4	404.8	464.8	476.3	450.4	450.3
Northwest Territories [61] (12)	Males	Colon, rectum and rectosigmoid junction cancer [C18.0-C18.9 C19.9 C20.9 C26.0]	Cancer incidence	123.6	104.2	103.9	125.3	91	99	117.6	155.9	113.5	88	76
Northwest Territories [61] (12)	Males	Bronchus and lung cancer [C34.0-C34.9]	Cancer incidence	113.7	83.4	87.7	88.9	81.1	68.4	45.6	59.8	72.4	87	92.8
Northwest Territories [61] (12)	Males	Prostate cancer [C61.9] (15)	Cancer incidence	45	53.6	71.2	61.5	72.2	62.9	84.1	80.4	114.1	111	127.8
Northwest Territories [61] (12)	Females	All invasive primary cancer sites (including in situ bladder) (13)	Cancer incidence	528.6	339.7	374.7	379.4	396.7	386.4	433.8	425.2	394.5	323.2	348.5
Northwest Territories [61] (12)	Females	Colon, rectum and rectosigmoid junction cancer [C18.0-C18.9 C19.9 C20.9 C26.0]	Cancer incidence	120.3	52.4	73.7	69.1	88.1	85.8	78.4	64.3	52.1	46.6	67.5
Northwest Territories [61] (12)	Females	Bronchus and lung cancer [C34.0-C34.9]	Cancer incidence	82.1	69.7	69.8	66	54.8	50.4	63.3	83.9	75.8	65.7	52.8
Northwest Territories [61] (12)	Females	Female breast cancer [C50.0-C50.9] (14)	Cancer incidence	133.6	83.8	102.3	91.8	117	110	146.7	129.5	120.8	83.8	90.1
Nunavut [62] (12)	Both sexes	All invasive primary cancer sites (including in situ bladder) (13)	Cancer incidence	651.8	496.5	466.6	557.6	541.5	602.8	636	549.7	579.6	511.4	512.1
Nunavut [62] (12)	Both sexes	Colon, rectum and rectosigmoid junction cancer [C18.0-C18.9 C19.9 C20.9 C26.0]	Cancer incidence	86.4	89	116.6	130.4	123.9	102	91.5	65	108.3	105.3	122
Nunavut [62] (12)	Both sexes	Bronchus and lung cancer [C34.0-C34.9]	Cancer incidence	280.8	236	208.2	271.8	242.3	293.4	310.4	273.6	249.7	212.6	206.8
Nunavut [62] (12)	Males	All invasive primary cancer sites (including in situ bladder) (13)	Cancer incidence	629.6	462.2	440.4	502.3	428.4	510.2	576	536.6	591.8	508.5	517.3
Nunavut [62] (12)	Males	Colon, rectum and rectosigmoid junction cancer [C18.0-C18.9 C19.9 C20.9 C26.0]	Cancer incidence	84.7	107.9	144.6	134	81.9	50.7	61.2	72.1	125.1	117.3	138.7
Nunavut [62] (12)	Males	Bronchus and lung cancer [C34.0-C34.9]	Cancer incidence	268.1	203.6	196.4	250.5	229.8	271.5	288.1	249.4	255.4	219.4	229.8
Nunavut [62] (12)	Males	Prostate cancer [C61.9] (15)	Cancer incidence	x	x	x	x	x	x	64.7	x	x	x	x
Nunavut [62] (12)	Females	All invasive primary cancer sites (including in situ bladder) (13)	Cancer incidence	668.5	535.6	495.2	622.9	688.6	736.9	731.3	574.5	561.1	515.9	502.6
Nunavut [62] (12)	Females	Colon, rectum and rectosigmoid junction cancer [C18.0-C18.9 C19.9 C20.9 C26.0]	Cancer incidence	92.3	59.8	73.1	113.5	172.3	170.5	136.4	56.8	86.6	93.3	101.2
Nunavut [62] (12)	Females	Bronchus and lung cancer [C34.0-C34.9]	Cancer incidence	285.3	279.8	229.9	314	267.4	334.6	343.9	309.7	236.9	203	178
Nunavut [62] (12)	Females	Female breast cancer [C50.0-C50.9] (14)	Cancer incidence	85.6	60	23.9	43.1	46.4	45.2	23.9	31.7	69	87.1	80.2
Legend:
x	Suppressed to meet the confidentiality requirements of the Statistics Act
Footnotes:
1	Sources: Statistics Canada, Canadian Cancer Registry (CCR) Database (July 2011 file) and Demography Division (population estimates). The CANSIM table 103-0404 is an update of the CANSIM table 103-0403.
2	World Health Organization, International Classification of Diseases for Oncology, Third Edition (ICD-O-3) and the International Agency for Research on Cancer (IARC) rules for determining multiple primaries sites.
3	Cancer incidence refers to new primary sites of malignant neoplasms. The Canadian Cancer Registry (CCR) is a dynamic database that can be updated with new records or changes to previous records, therefore, the incidence counts may vary from one release to the next.
4	Health regions are administrative areas defined by provincial ministries of health according to provincial legislation. The health regions presented in this table are based on boundaries and names in effect as of October 2011. For complete Canadian coverage, each northern territory represents a health region.
5	Peer groups are aggregations of health regions that share similar socio-economic and demographic characteristics, based on 2006 Census data. These are useful in the analysis of health regions, where important differences may be detected by comparing health regions within a peer group. The ten peer groups are identified by the letters A through J, which are appended to the health region 4-digit co…
6	To help with results interpretation, it is important to note that cancers reported to the Quebec Tumour Registry are those that required hospitalization or day surgery. Therefore, certain cases diagnosed and treated solely on an external or ambulatory basis are not reported to the Quebec Tumour Registry, or some cases are reported at a more advanced stage of the disease when hospitalization is re…
7	In Ontario, Public Health Units (PHU) administer health promotion and disease prevention programs. Local Health Integration Networks (LHIN) are responsible for planning, funding and administering health care programs and services across the province. Data are provided for both PHUs and LHINs. However, since the weights for the Canadian Community Health Survey sample are primarily based on PHUs, o…
8	Ontario does not report in situ bladder cases to the Canadian Cancer Registry. Non-melanoma skin cancers are not registered in Ontario. Incidence for Kaposi's is heavily underestimated.
9	In Manitoba and Saskatchewan, health regions are referred to as Health Authorities (HA) or Regional Health Authorities (RHA).
12	Nunavut became a territory in April 1999 and historical data are provided for comparison purposes. Current and historical cancer data are presented for the current boundaries of the Northwest Territories and Nunavut.
13	Excluding morphology types M-9050 to M-9055; M-9140; M-9590 to M-9989.
14	Rates for breast cancer (International Classification of Diseases for Oncology, Third Edition (ICD-O-3) codes C50.0 to C50.9) were calculated for females only.
15	Rates for prostate cancer (International Classification of Diseases for Oncology, Third Edition (ICD-O-3) code C61.9) were calculated for males only.
16	Cancer incidence rates are age-standardized using the direct method and the 1991 Canadian Census population structure. The use of a standard population results in more meaningful incidence rate comparisons, because it adjusts for variations in population age distributions over time and across geographic areas.
17	The confidence intervals for the age-standardized cancer incidence rates were produced using the method found in the following reference: Fay M.P. and E.J. Feuer. 1997. "Confidence intervals for directly standardized rates: a method based on the gamma distribution." Statistics in Medicine. Volume 16, pages 791 to 801.
18	The 95% confidence interval (CI) illustrates the degree of variability associated with a rate. Wide confidence intervals indicate high variability, thus, these rates should be interpreted and compared with due caution.
19	G-Confid, developed at Statistics Canada, is used to prevent the disclosure of low-incidence cells in cancer data. All non-empty cells based on fewer than five cases (sensitive cells) are suppressed, and additional cells based on five or more cases are suppressed to ensure that sensitive cells' value cannot be calculated from the released table.
20	The following standard symbols are used in this Statistics Canada table: (..) for figures not available for a specific reference period, (...) for figures not applicable and (x) for figures suppressed to meet the confidentiality requirements of the Statistics Act.
Source:
Statistics Canada. Table 103-0404 - Cancer incidence, by selected sites of cancer and sex, three-year average, Canada, provinces, territories and health regions (2011 boundaries), occasional (age-standardized rate per 100,000 population)
(accessed: January 23, 2015)

## Sheet: cansim-1020705-eng-236781069230
Table 102-0705 Potential years of life lost, by selected causes of death (ICD-10) and sex, five-year average, Canada and Inuit regions, every 5 years(1,2,3,4,13)
Survey or program details:
Vital Statistics - Death Database - 3233
Estimates of Population by Age and Sex for Canada, Provinces and Territories - 3604
Geography (5)	Sex	Selected causes of death (ICD-10) (13)	Characteristics (8)	1994/1998	1999/2003	2004/2008
Canada (6)	Both sexes	Total, all causes of death [A00-Y89]	Number of potential years of life lost	8066640	7528750	7596535
Canada (6)	Both sexes	Total, all causes of death [A00-Y89]	Crude rate of potential years of life lost (crude rate per 100,000 population) (9)	5737.2	5146.2	4976.2
Canada (6)	Both sexes	Total, all causes of death [A00-Y89]	Age-standardized rate of potential years of life lost (age-standardized rate per 100,000 population) (10)	4711.9	4130.4	3859.3		852.6
Canada (6)	Both sexes	All malignant neoplasms (cancers) [C00-C97]	Number of potential years of life lost	2314238	2351452	2350118
Canada (6)	Both sexes	All malignant neoplasms (cancers) [C00-C97]	Crude rate of potential years of life lost (crude rate per 100,000 population) (9)	1646	1607.3	1539.5
Canada (6)	Both sexes	All malignant neoplasms (cancers) [C00-C97]	Age-standardized rate of potential years of life lost (age-standardized rate per 100,000 population) (10)	1001	910.1	796.7		204.3
Footnotes:
1	Sources: Statistics Canada, Canadian Vital Statistics, Death Database and Demography Division (population estimates)
2	Potential years of life lost (PYLL) is the number of years of potential life not lived when a person dies "prematurely", defined for this indicator as before age 75.
3	Numbers and rates on this table are based on the summation of five consecutive years of deaths data.
4	Rates in this table exclude: deaths of non-residents of Canada; deaths of residents of Canada whose province or territory of residence was unknown; and, deaths for which age or sex of decedent was unknown.
5	The geographic distribution of deaths in this table is based on the place of residence of the deceased.
6	Numbers and rates for Canada include deaths for Inuit Nunangat.
8	Population estimates for are based on the 2001 Census adjusted for net undercoverage and components of population growth. For 1996, population estimates are final intercensal, for 2001 they are final postcensal, and for 2006 they are updated postcensal.
9	The rate is calculated as follows: sum of potential years of life lost (PYLL) for ages 0 to 74 for the five years of reference, divided by five times the estimate of the population aged 0 to 74 for the middle year of the five years of reference.
10	Age-standardized to the 2001 total population age structure of Inuit Nunangat.
13	World Health Organization (WHO), International Statistical Classification of Diseases and Related Health Problems, Tenth Revision (ICD-10)
Source:
Statistics Canada. Table 102-0705 - Potential years of life lost, by selected causes of death (ICD-10) and sex, five-year average, Canada and Inuit regions, every 5 years
(accessed: January 23, 2015)
				1996	2001	2006
			Characteristics (8)	1994/1998	1999/2003	2004/2008
			Age-standardized rate of potential years of life lost (age-standardized rate per 100,000 population) (10)	1001	910.1	796.7
				1996/1998	1997/1999	1998/2000	1999/2001	2000/2002	2001/2003	2002/2004	2003/2005	2004/2006	2005/2007
				391.4	396	400.5	404.3	404.8	402.3	400.6	401.2	403.6	404.9
			Characteristics (8)	1994/1998	1996/1998	1999/2003	2004/2008
			Year	1997	2001	2006
			Premature (before age 75) cancer mortality rate	1001	910.1	796.7
			Cancer incidence rate	396	404.8	404.9

[truncated: 13 more sheets: trend0 (2), cansim-1030550-eng-343858122186, mean 2010 su by post1999, who10 (3), Q2, class1, class2, class3, complete, complete0, cansim-1020705-eng-455510142641, Sheet4, age-utilization profile]
